# Supplementary material for: Intramolecular Lewis pairs with two acid sites – reactivity differences between P- and N-based systems
Source: Royal Society of Chemistry journal article supplement (doi:10.1039/c6dt03490j), 2016-01-01
Supplement: c6dt03490j1.pdf [file c6dt03490j1.pdf]

## Intramolecular Lewis pairs with two acid sites – reactivity differences between P- and N-based systems

Leif A. Körte, Sebastian Blomeyer, Shari Heidemeyer, Jan Hendrick Nissen, Andreas Mix, Beate Neumann, Hans-Georg Stammer and Norbert W. Mitzel\*

Lehrstuhl für Anorganische Chemie und Strukturchemie und Centrum für Molekulare Materialien CM<sub>2</sub>, Fakultät für Chemie, Universität Bielefeld, Universitätsstraße 25, 33615 Bielefeld (Germany)

E-mail: mitzel@uni-bielefeld.de

### Supporting Information

#### *N,N*-Diallyl-*tert*-butylamine (3)

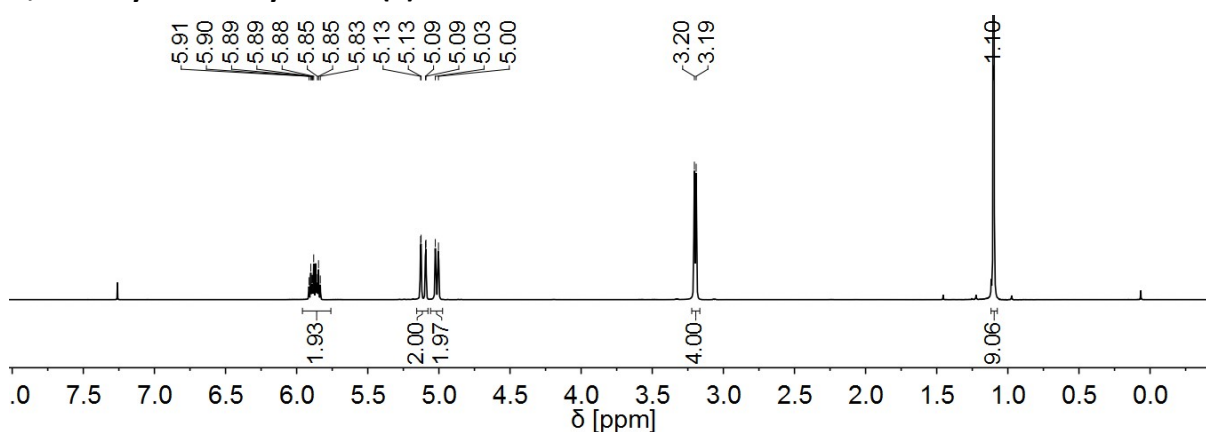

Figure S1. <sup>1</sup>H NMR spectrum (500 MHz, CDCl<sub>3</sub>) of *N,N*-Diallyl-*tert*-butylamine (3).

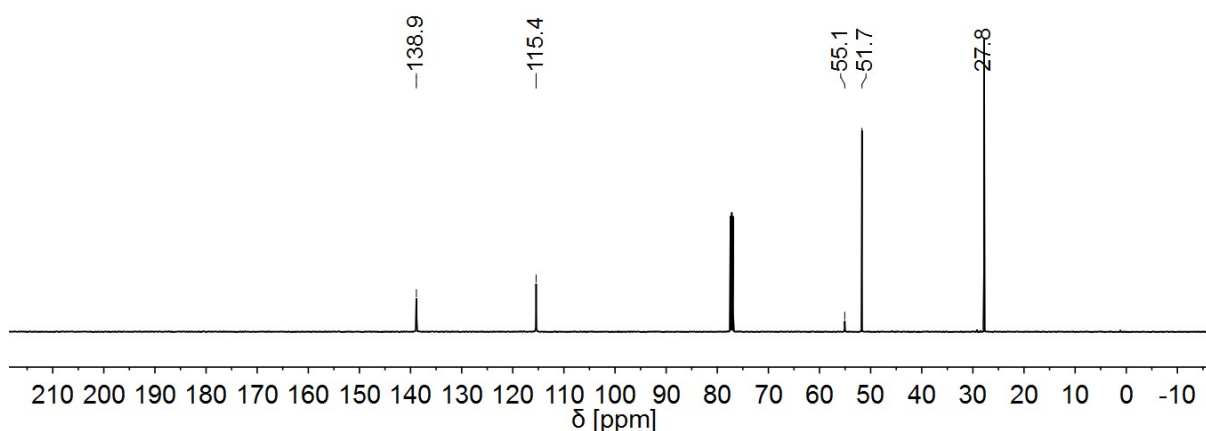

Figure S2. <sup>13</sup>C NMR spectrum (126 MHz, CDCl<sub>3</sub>) of *N,N*-Diallyl-*tert*-butylamine (3).

### Cyclic iminium borate 5

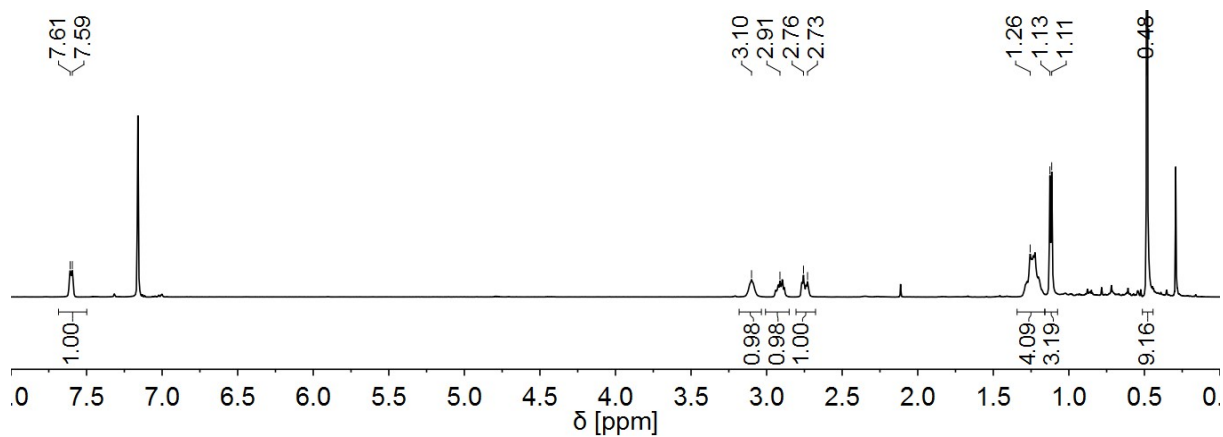

Figure S3.  $^1\text{H}$  NMR spectrum (500 MHz,  $\text{C}_6\text{D}_6$ ) of the cyclic iminium borate 5.

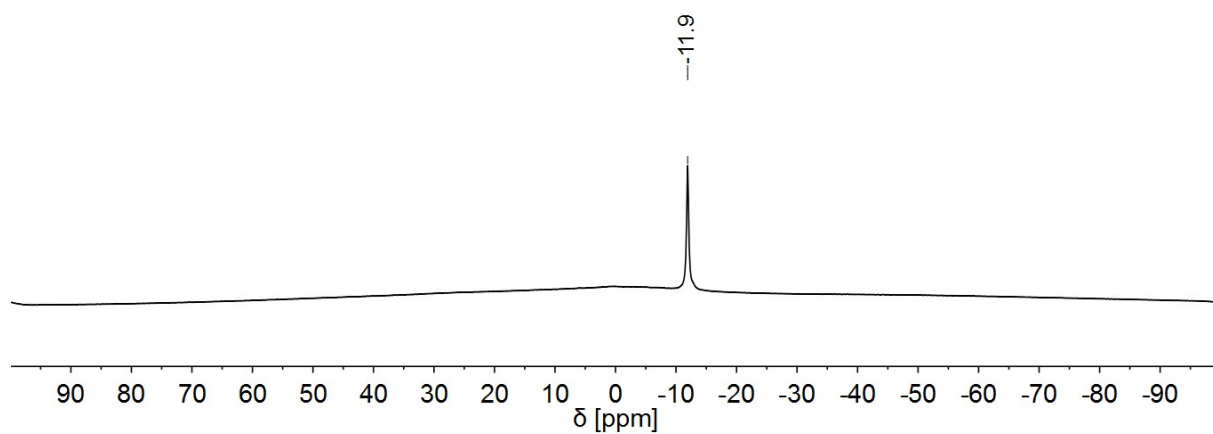

Figure S4.  $^{11}\text{B}$  NMR spectrum (160 MHz,  $\text{C}_6\text{D}_6$ ) of the cyclic iminium borate 5.

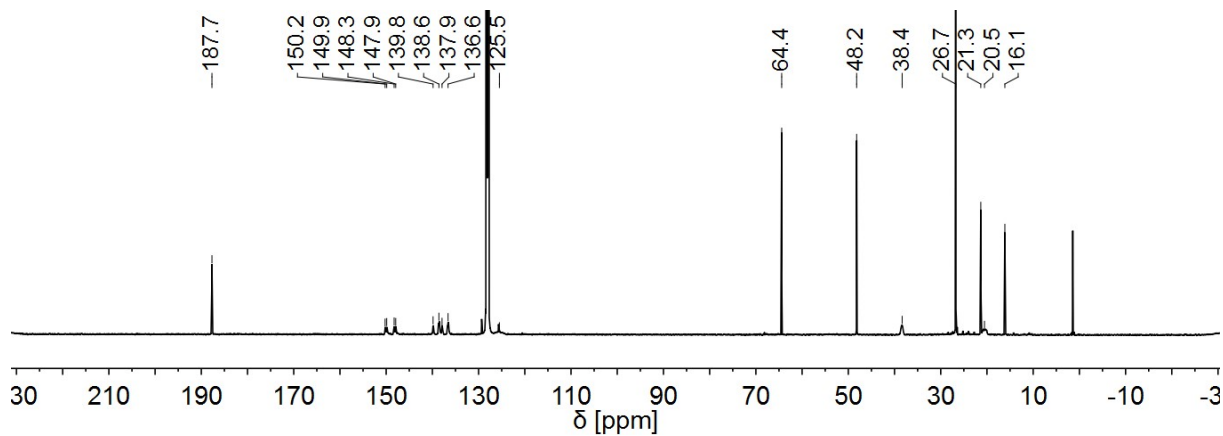

Figure S5.  $^{13}\text{C}$  NMR spectrum (126 MHz,  $\text{C}_6\text{D}_6$ ) of the cyclic iminium borate 5.

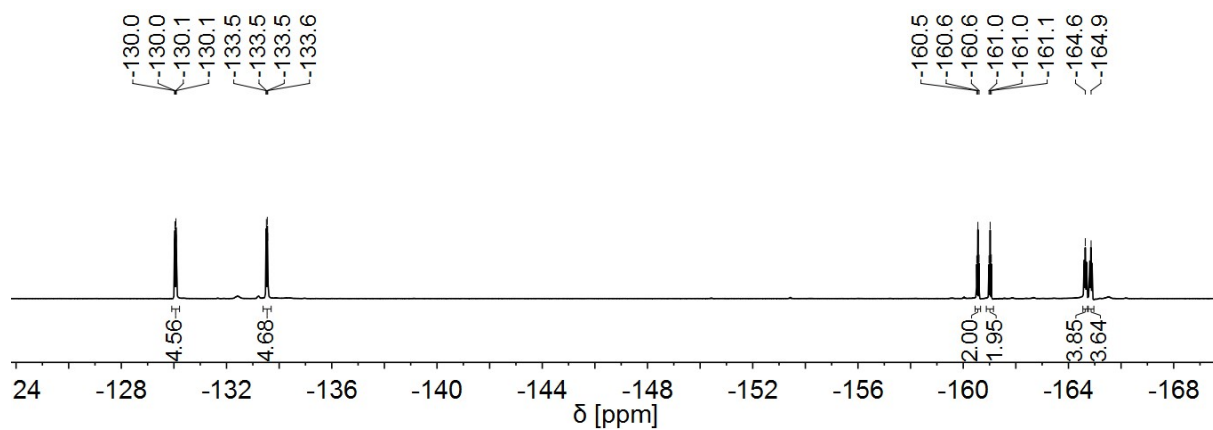

Figure S6.  $^{19}\text{F}$  NMR spectrum (470 MHz,  $\text{C}_6\text{D}_6$ ) of the cyclic iminium borate **5**.

***tert*-Butyl-*N,N*-dipropargylamine (**8**)**

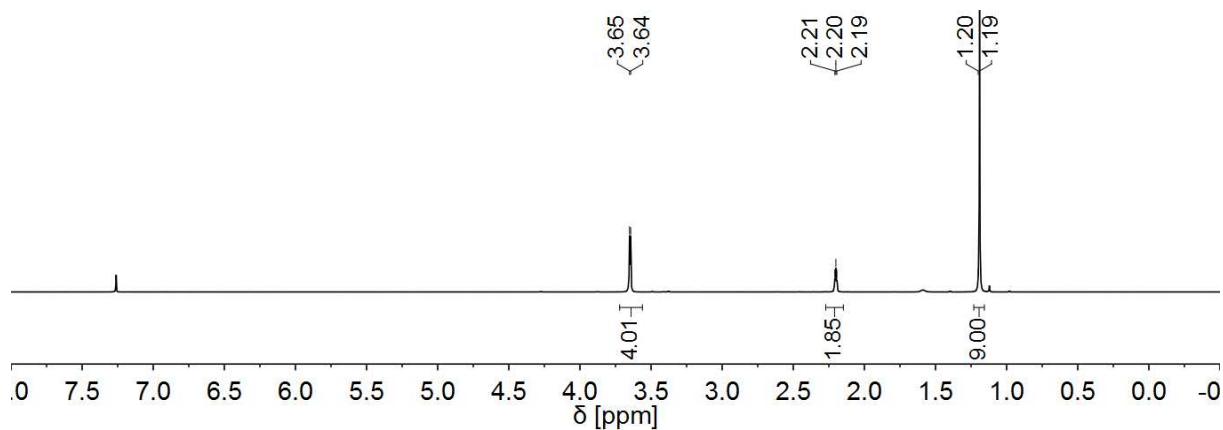

Figure S7.  $^1\text{H}$  NMR spectrum (300 MHz,  $\text{CDCl}_3$ ) of *tert*-butyl-*N,N*-dipropargylamine (**8**).

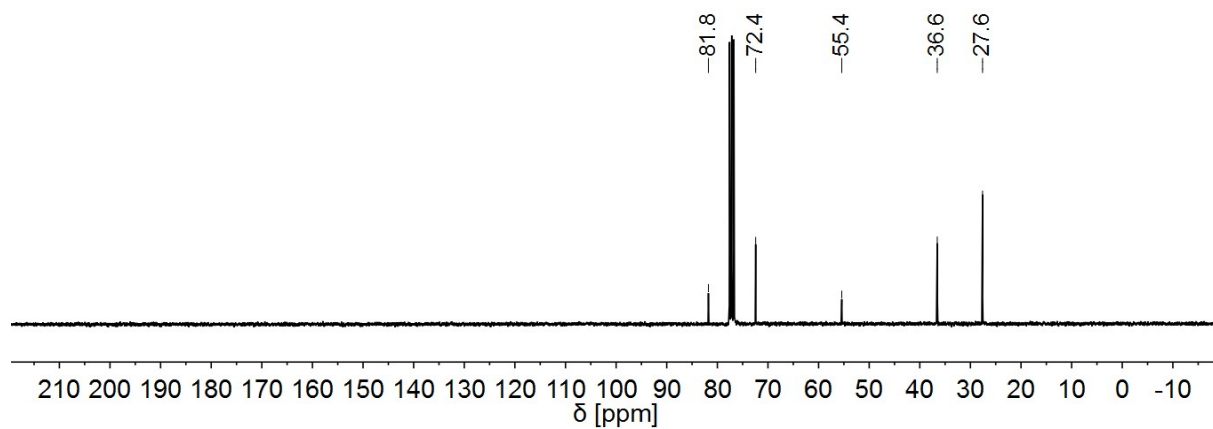

Figure S8.  $^{13}\text{C}$  NMR spectrum (76 MHz,  $\text{CDCl}_3$ ) of *tert*-butyl-*N,N*-dipropargylamine (**8**).

**In situ synthesis of  $t\text{-Bu-N-}[\text{CH}_2\text{-CH=CH-B}(\text{C}_6\text{F}_5)_2]_2$  **9****

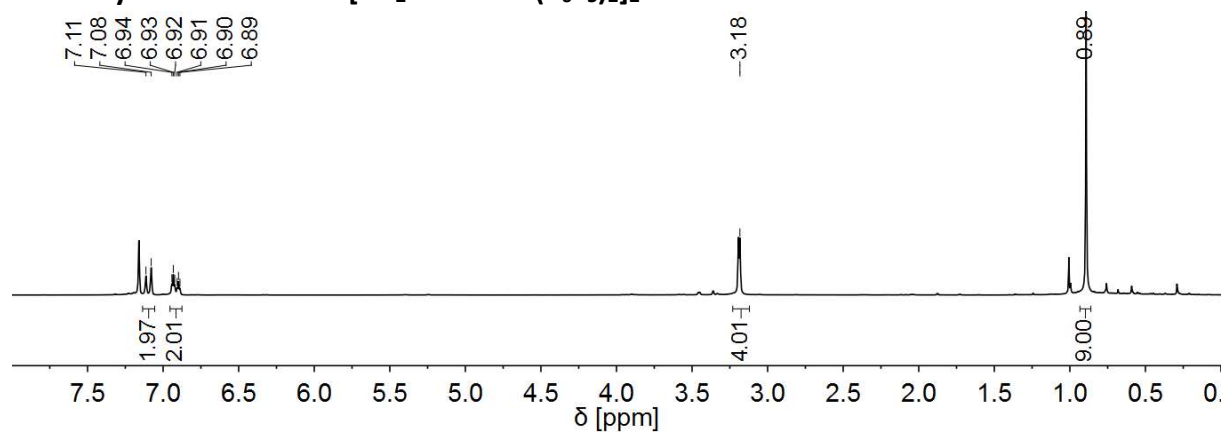

Figure S9.  $^1\text{H}$  NMR spectrum (500 MHz,  $\text{C}_6\text{D}_6$ ) of the hydroboration product **9** of *tert*-butyl-*N,N*-dipropargylamine (**8**).

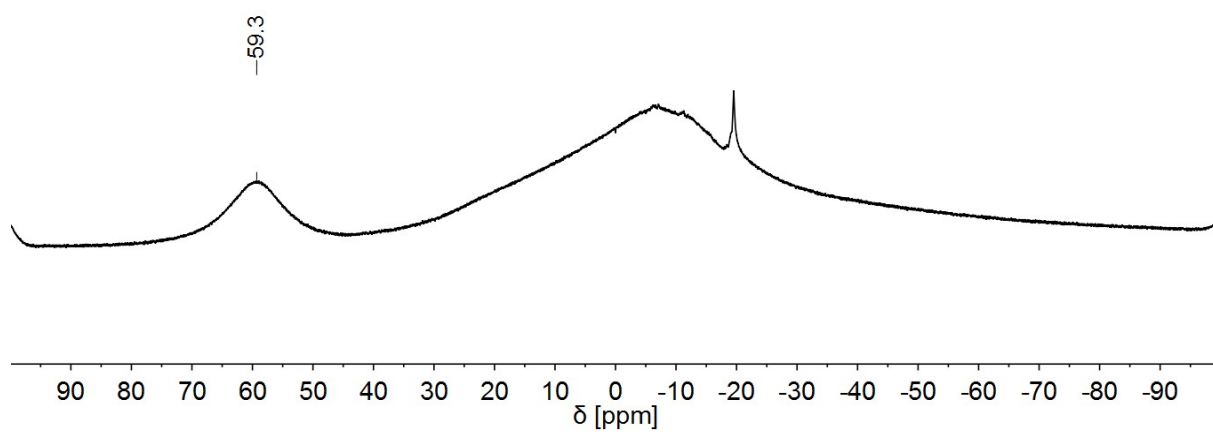

Figure S10.  $^{13}\text{B}$  NMR spectrum (160 MHz,  $\text{C}_6\text{D}_6$ ) of the hydroboration product **9** of *tert*-butyl-*N,N*-dipropargylamine (**8**) with traces of a decomposition product with a resonance at  $-19.5$  ppm.

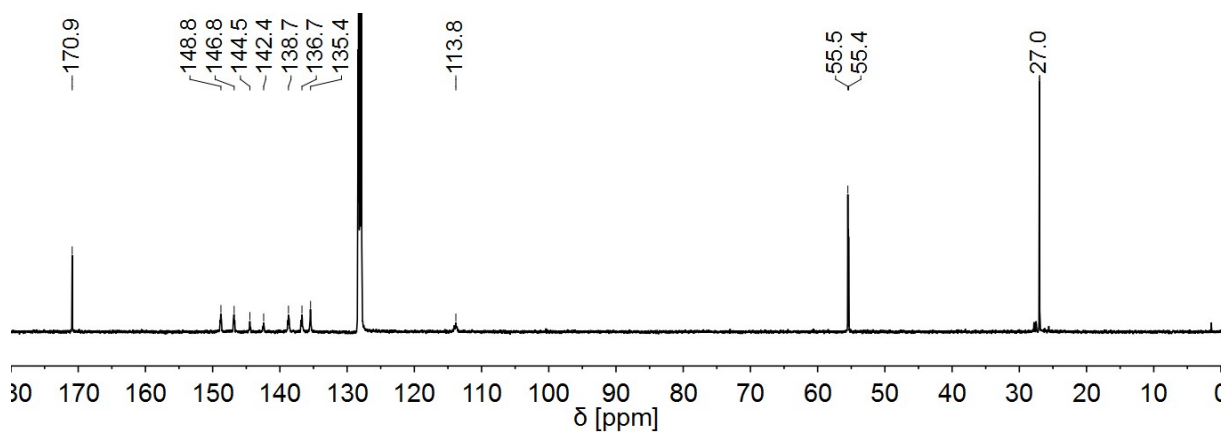

Figure S11.  $^{13}\text{C}$  NMR spectrum (126 MHz,  $\text{C}_6\text{D}_6$ ) of the hydroboration product **9** of *tert*-butyl-*N,N*-dipropargylamine (**8**).

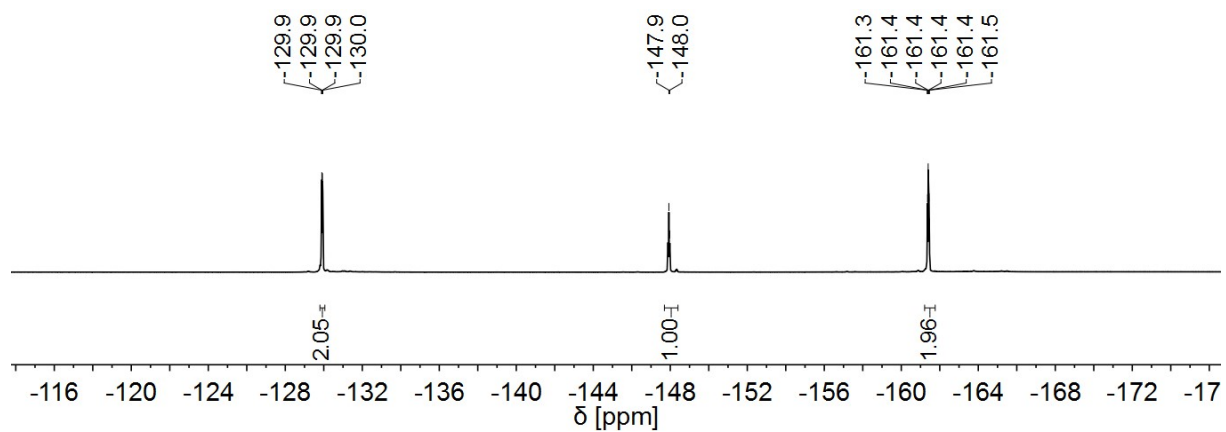

Figure S12.  $^{19}\text{F}$  NMR spectrum (470 MHz,  $\text{C}_6\text{D}_6$ ) of the hydroboration product 9 of *tert*-butyl-*N,N*-dipropargylamine (8).

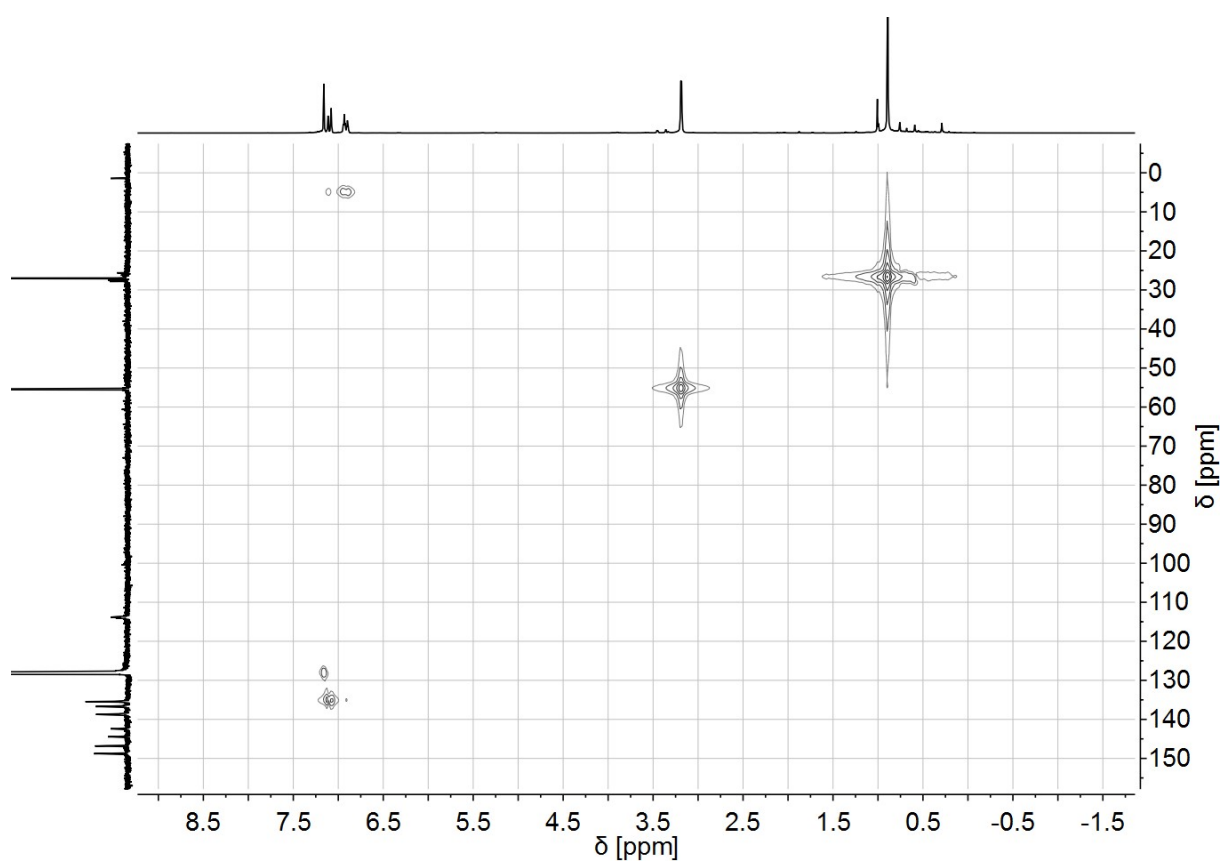

Figure S13.  $^1\text{H}^{13}\text{C}$  HMQC NMR spectrum (500 MHz,  $\text{C}_6\text{D}_6$ ) of the hydroboration product 9 of *tert*-butyl-*N,N*-dipropargylamine (8).

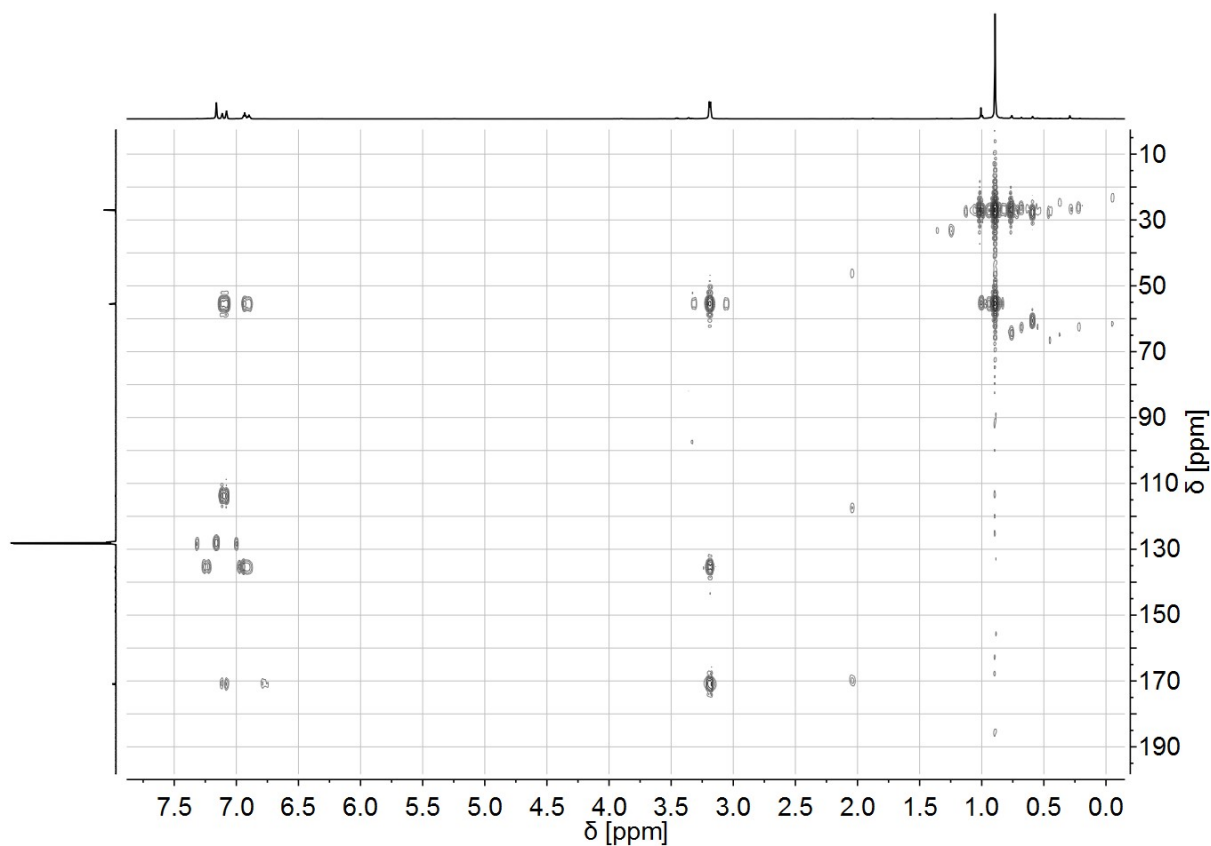

Figure S14.  $^{13}\text{C}$  HMBC NMR spectrum (500 MHz,  $\text{C}_6\text{D}_6$ ) of the hydroboration product **9** of *tert*-butyl-*N,N*-dipropargylamine (**8**).

**Synthesis of  $^t\text{Bu-N-}[\text{CH}_2\text{-CH=CH-B}(\text{C}_6\text{F}_5)_2]_2 \cdot 2\text{NMe}_3$  (**10**)**

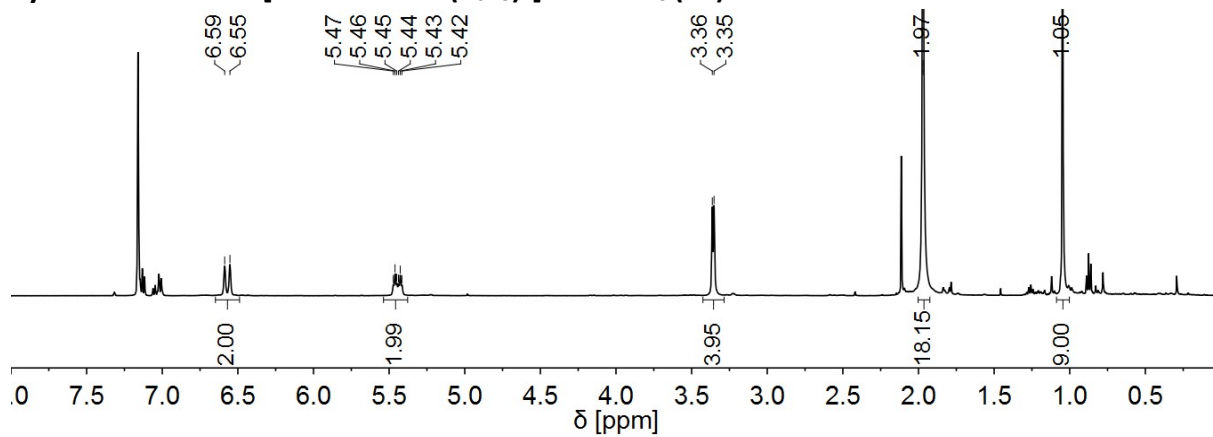

Figure S15.  $^1\text{H}$  NMR spectrum (500 MHz,  $\text{C}_6\text{D}_6$ ) of amine adduct  $^t\text{Bu-N-}[\text{CH}_2\text{-CH=CH-B}(\text{C}_6\text{F}_5)_2]_2 \cdot 2\text{NMe}_3$  (**10**) with trace impurities of toluene.

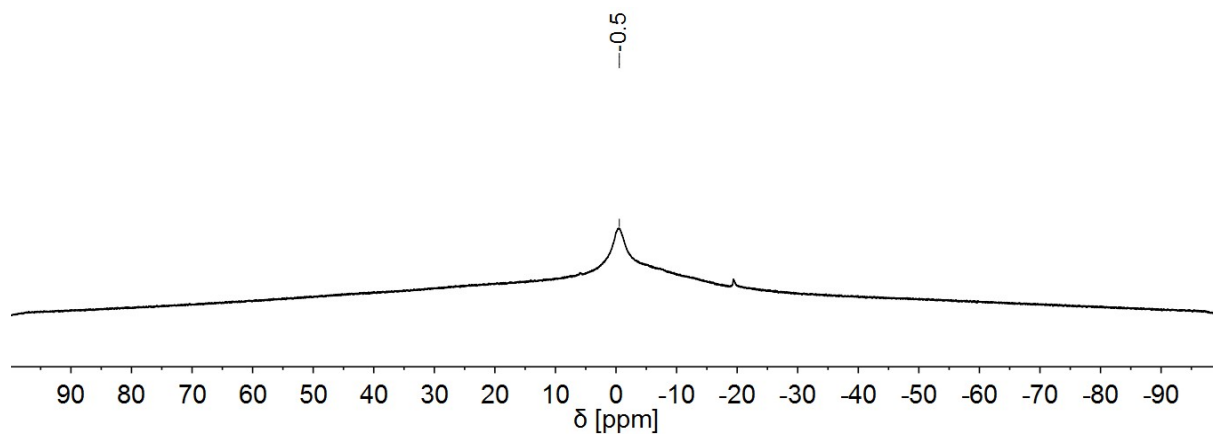

Figure S16.  $^{13}\text{B}$  NMR spectrum (160 MHz,  $\text{C}_6\text{D}_6$ ) of amine adduct  $^t\text{Bu-N}[\text{CH}_2\text{-CH=CH-B}(\text{C}_6\text{F}_5)_2]_2 \cdot 2\text{NMe}_3$  (**10**).

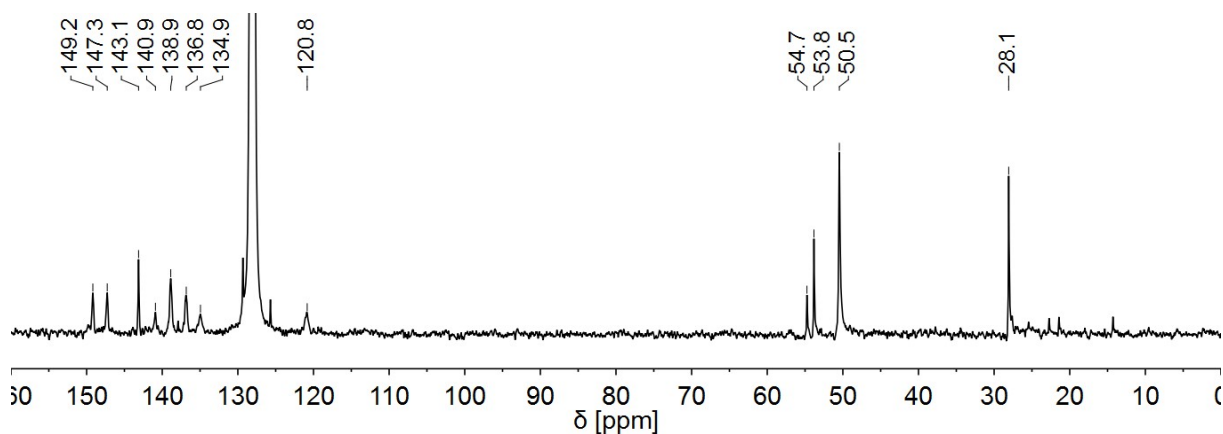

Figure S17.  $^{13}\text{C}$  NMR spectrum (126 MHz,  $\text{C}_6\text{D}_6$ ) of amine adduct  $^t\text{Bu-N}[\text{CH}_2\text{-CH=CH-B}(\text{C}_6\text{F}_5)_2]_2 \cdot 2\text{NMe}_3$  (**10**) with trace impurities of toluene.

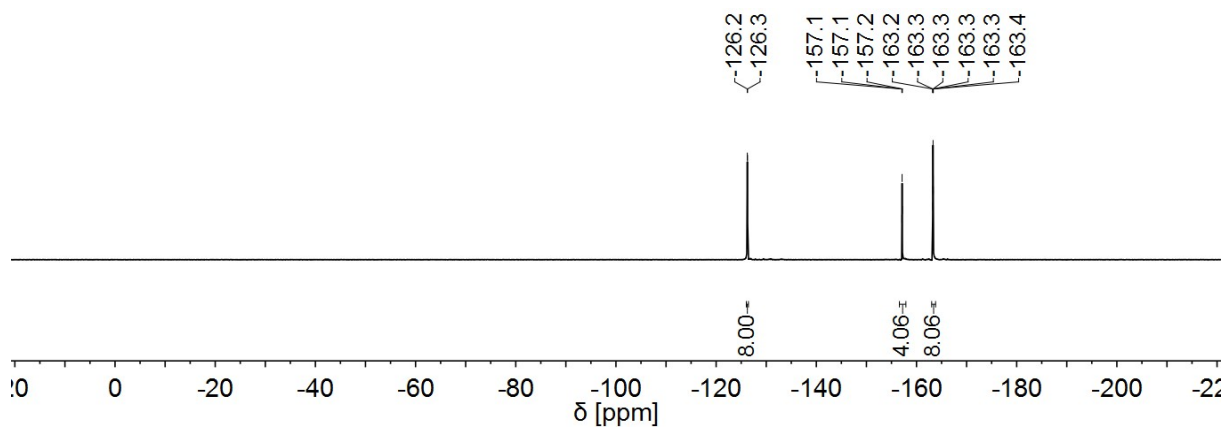

Figure S18.  $^{19}\text{F}$  NMR spectrum (470 MHz,  $\text{C}_6\text{D}_6$ ) of amine adduct  $^t\text{Bu-N}[\text{CH}_2\text{-CH=CH-B}(\text{C}_6\text{F}_5)_2]_2 \cdot 2\text{NMe}_3$  (**10**).

### Diallylphenylphosphine 12

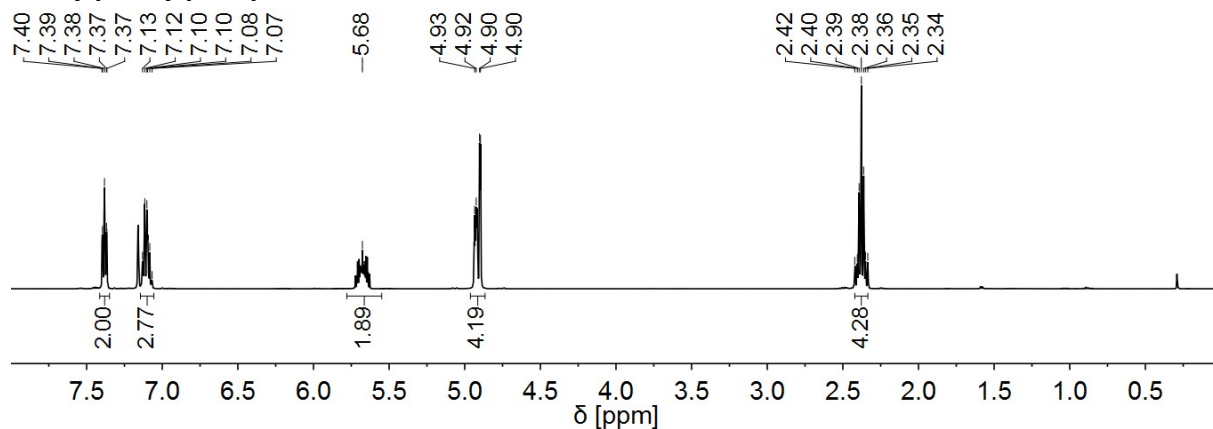

Figure S19. <sup>1</sup>H NMR spectrum (500 MHz, C<sub>6</sub>D<sub>6</sub>) of diallylphenylphosphine (12).

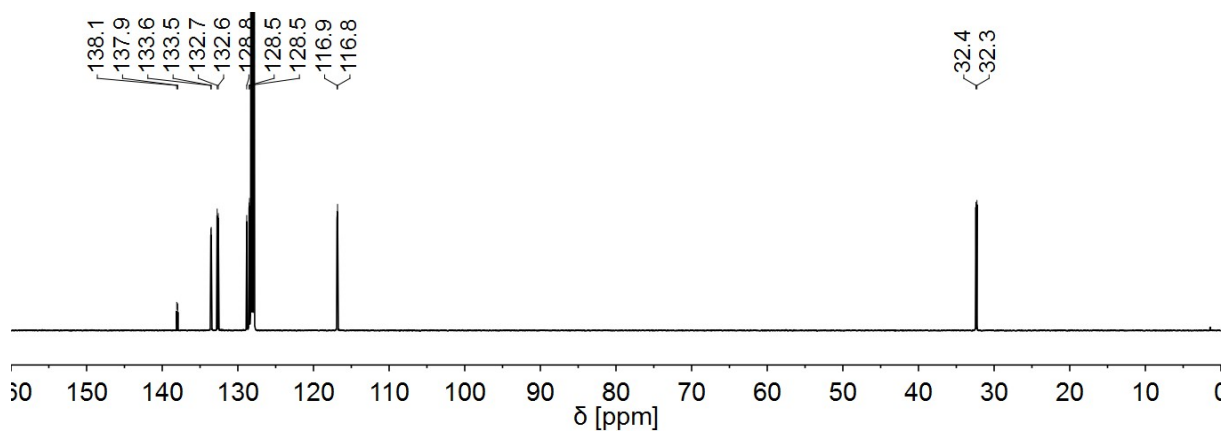

Figure S20. <sup>13</sup>C NMR spectrum (126 MHz, C<sub>6</sub>D<sub>6</sub>) of diallylphenylphosphine (12).

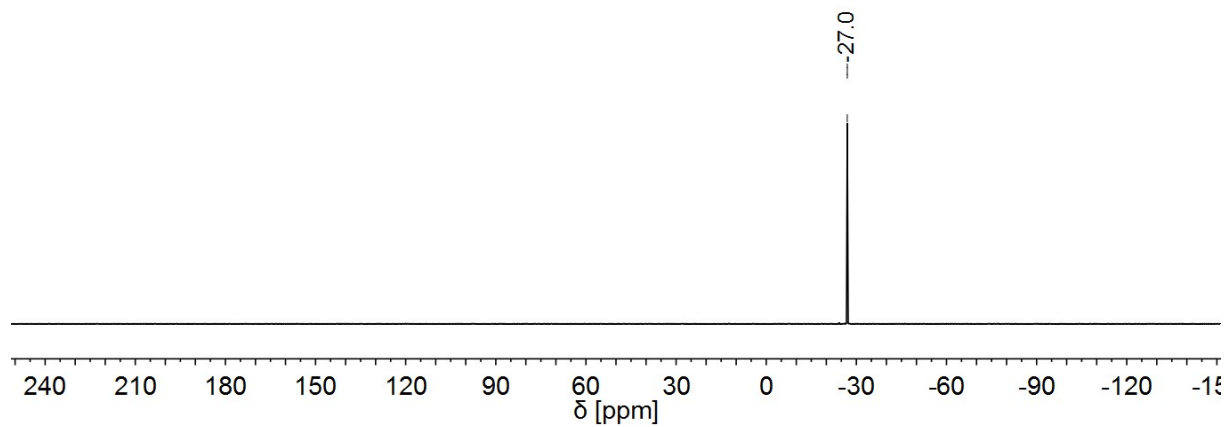

Figure S21. <sup>31</sup>P NMR spectrum (203 MHz, C<sub>6</sub>D<sub>6</sub>) of diallylphenylphosphine (12).



## Hydroboration of Diallylphenylphosphine to 13

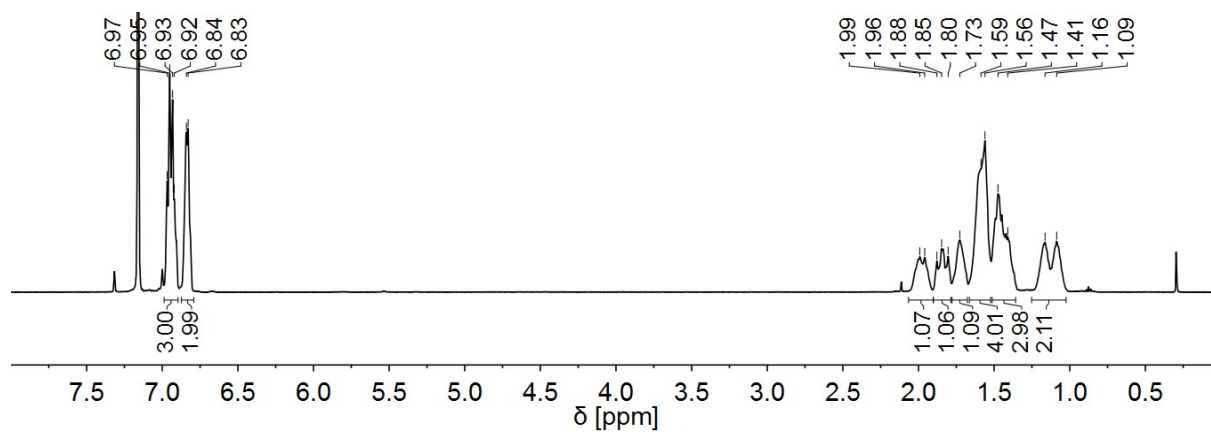

Figure S22. <sup>1</sup>H NMR spectrum (500 MHz, C<sub>6</sub>D<sub>6</sub>) of the doubly hydroboration product **13** of diallylphenylphosphine (**12**).

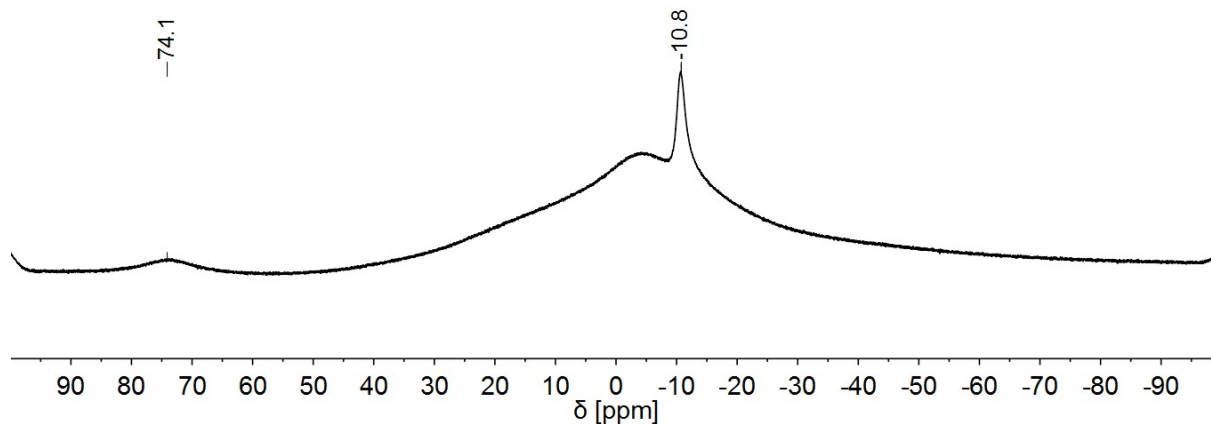

Figure S23. <sup>13</sup>B NMR spectrum (160 MHz, C<sub>6</sub>D<sub>6</sub>) of the doubly hydroboration product **13** of diallylphenylphosphine (**12**).

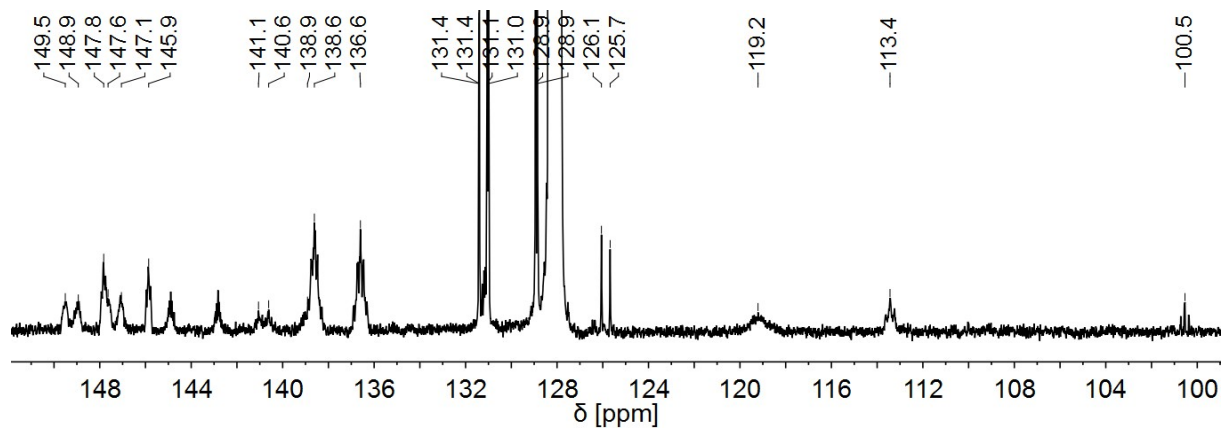

Figure S24. Excerpt of <sup>13</sup>C NMR spectrum (126 MHz, C<sub>6</sub>D<sub>6</sub>) of the doubly hydroboration product **13** of diallylphenylphosphine (**12**).

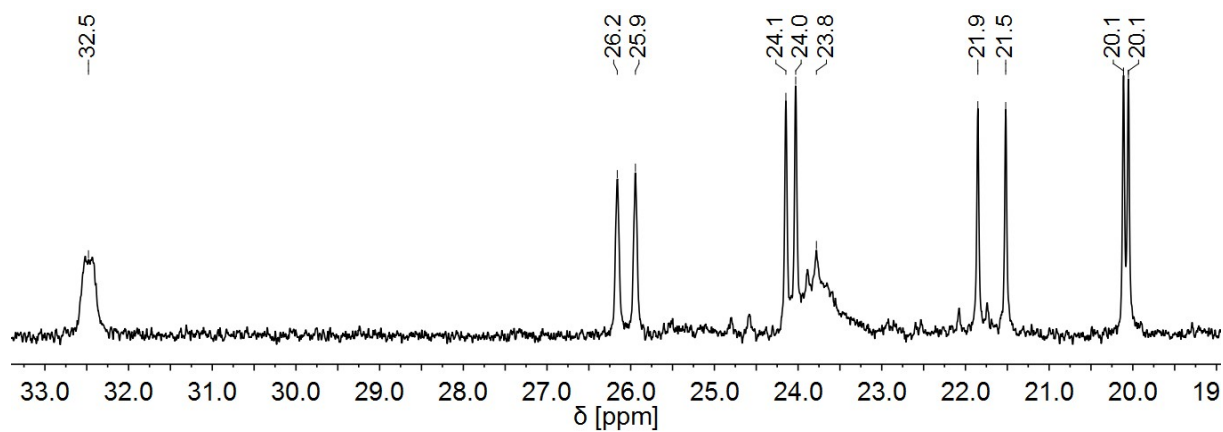

Figure S25. Excerpt of  $^{13}\text{C}$  NMR spectrum (126 MHz,  $\text{C}_6\text{D}_6$ ) of the doubly hydroboration product **13** of diallylphenylphosphine (**12**).

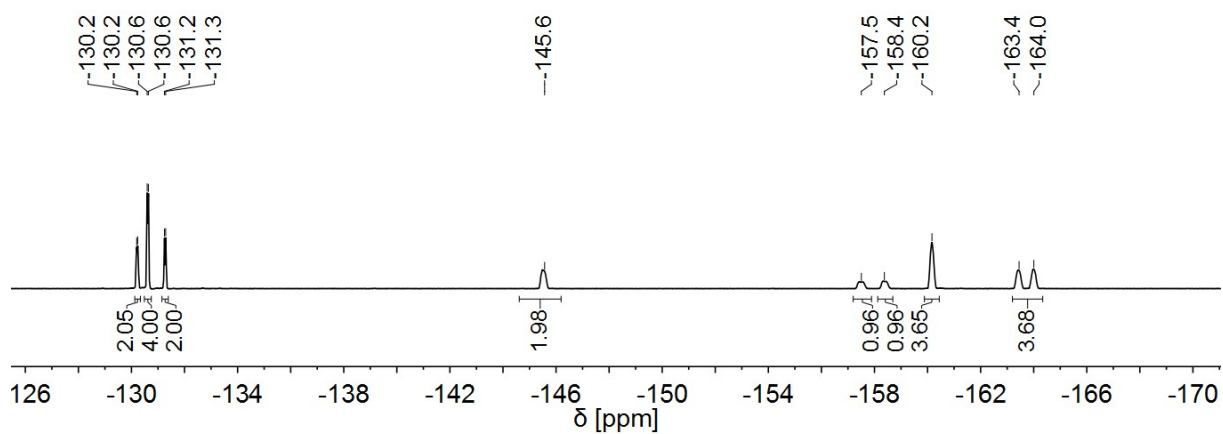

Figure S26.  $^{19}\text{F}$  NMR spectrum (470 MHz,  $\text{C}_6\text{D}_6$ ) of the doubly hydroboration product **13** of diallylphenylphosphine (**12**).

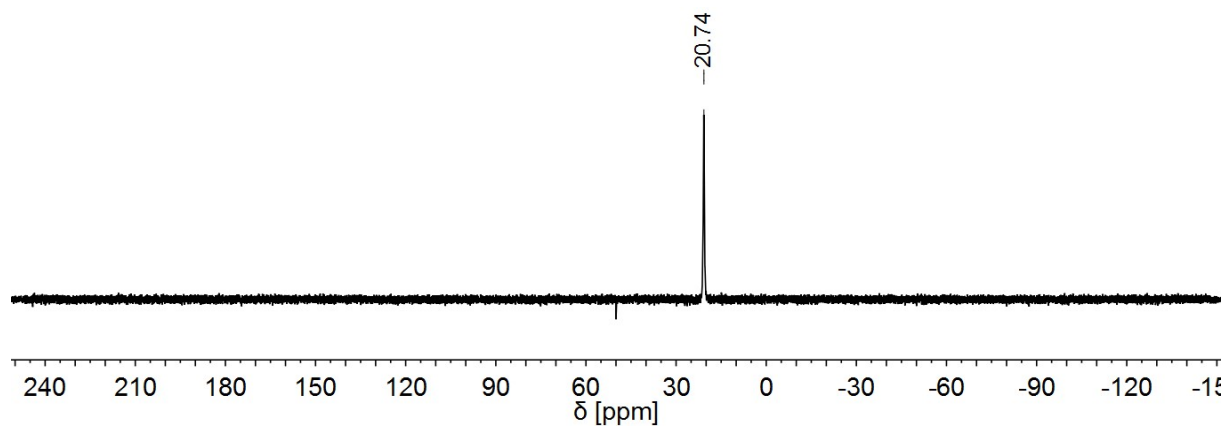

Figure S27.  $^{31}\text{P}$  NMR spectrum (203 MHz,  $\text{C}_6\text{D}_6$ ) of the doubly hydroboration product **13** of diallylphenylphosphine (**12**).

### Diallyl-*tert*-butylphosphine 15

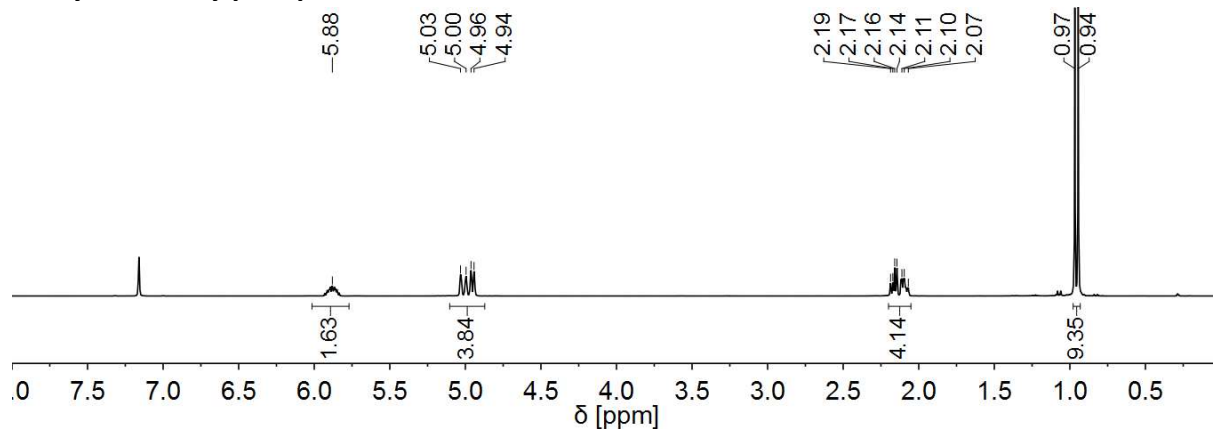

Figure S28. <sup>1</sup>H NMR spectrum (500 MHz, C<sub>6</sub>D<sub>6</sub>) of diallyl-*tert*-butylphosphine (15).

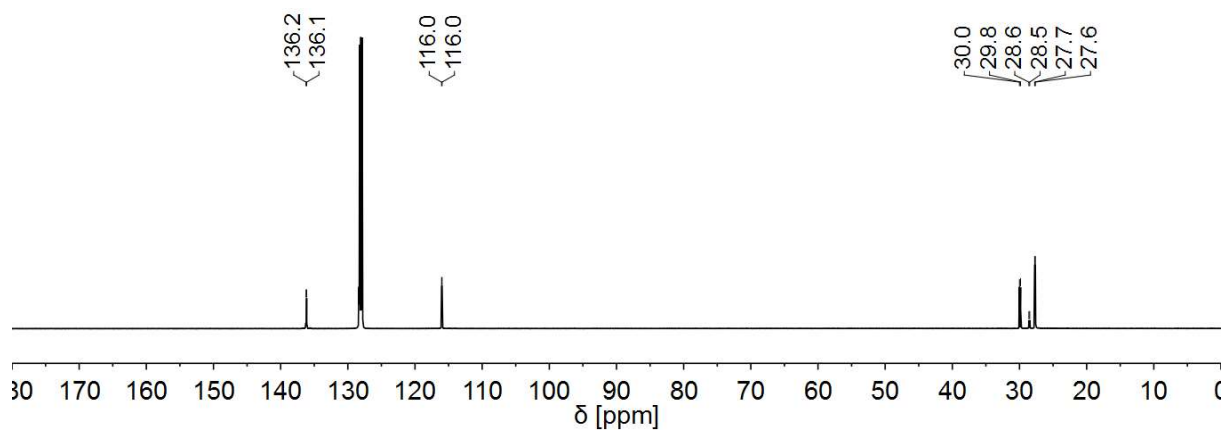

Figure S29. <sup>13</sup>C NMR spectrum (126 MHz, C<sub>6</sub>D<sub>6</sub>) of diallyl-*tert*-butylphosphine (15).

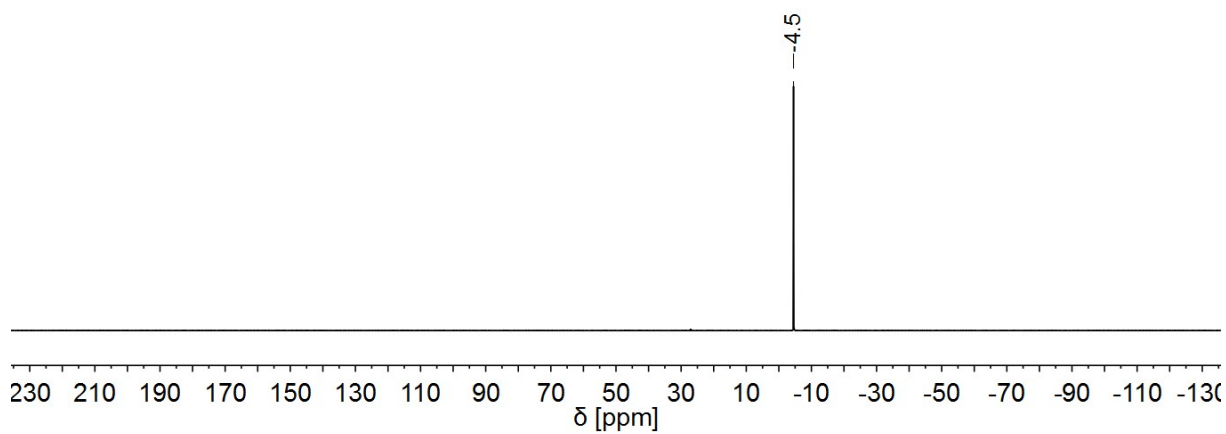

Figure S30. <sup>31</sup>P NMR spectrum (203 MHz, C<sub>6</sub>D<sub>6</sub>) of diallyl-*tert*-butylphosphine (15).

## Hydroboration of *tert*-butyldiallylphosphine to **16**

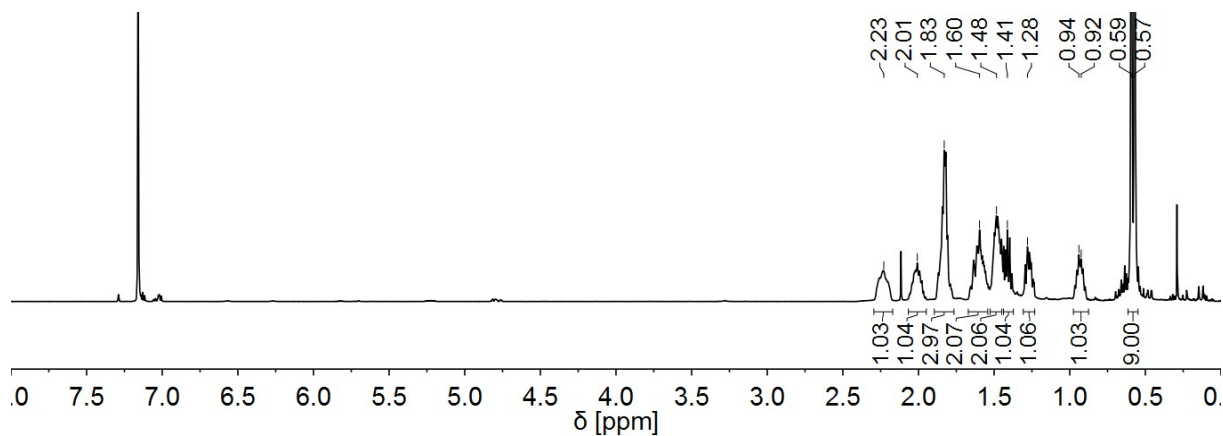

Figure S31. <sup>1</sup>H NMR spectrum (600 MHz, C<sub>6</sub>D<sub>6</sub>) of the doubly hydroboration product **16** of *tert*-butyldiallylphosphine (**15**).

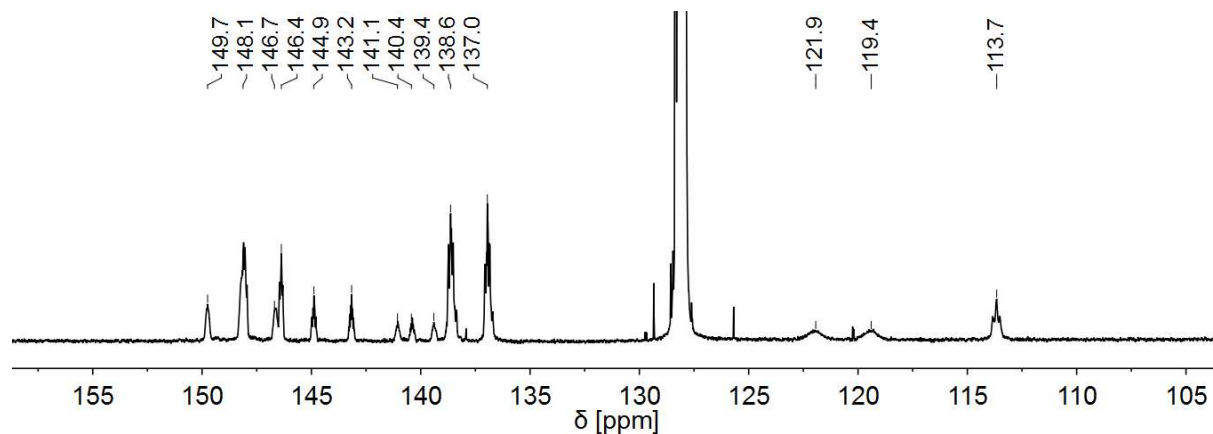

Figure S32. Excerpt of <sup>13</sup>C NMR spectrum (151 MHz, C<sub>6</sub>D<sub>6</sub>) of the doubly hydroboration product **16** of *tert*-butyldiallylphosphine (**15**).

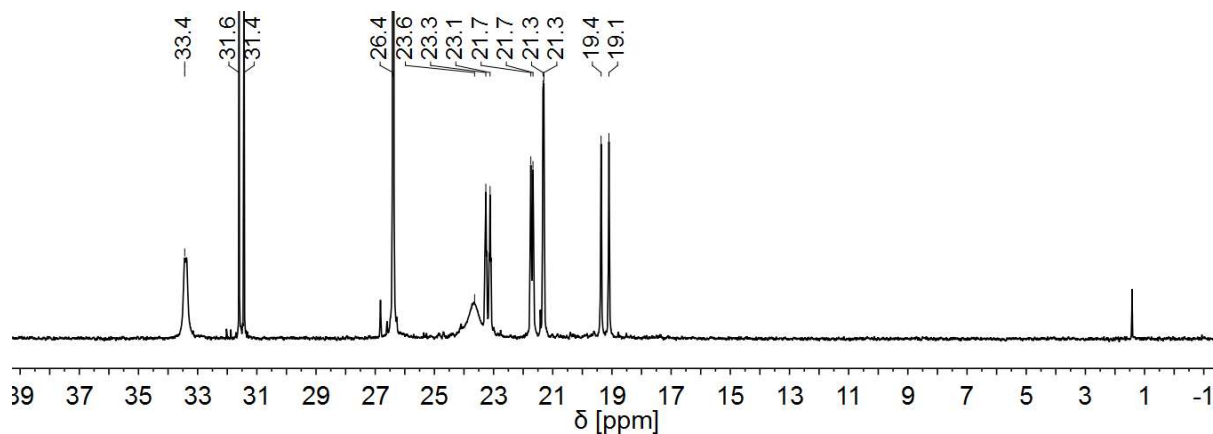

Figure S33. Excerpt of <sup>13</sup>C NMR spectrum (151 MHz, C<sub>6</sub>D<sub>6</sub>) of the doubly hydroboration product **16** of *tert*-butyldiallylphosphine (**15**).

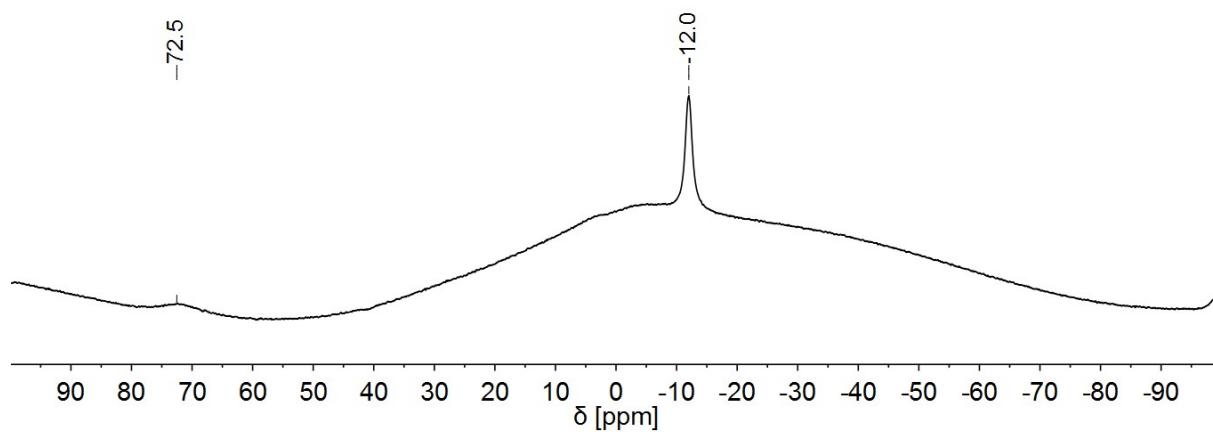

Figure S34.  $^{11}\text{B}$  NMR spectrum (160 MHz,  $\text{C}_6\text{D}_6$ ) of the doubly hydroboration product **16** of *tert*-butylidiallylphosphine (**15**).

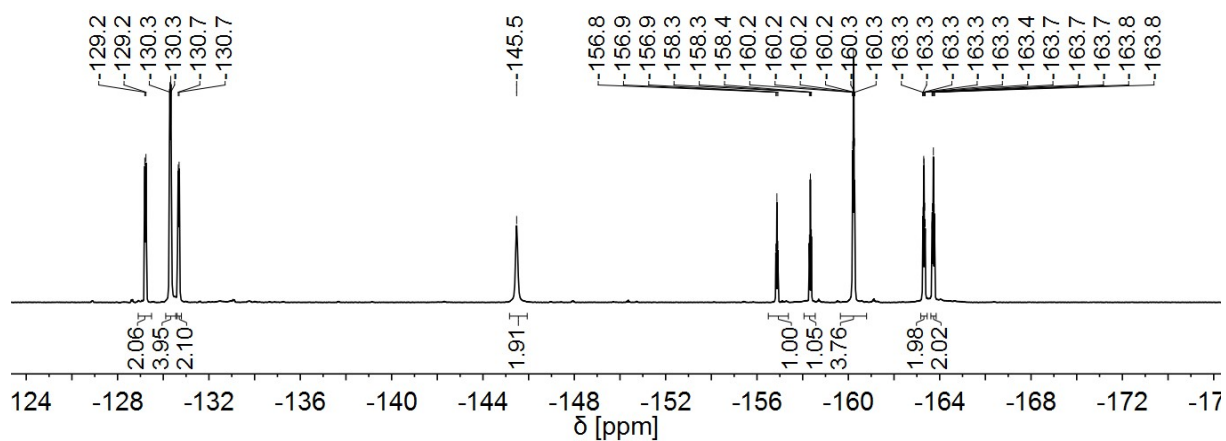

Figure S35.  $^{19}\text{F}$  NMR spectrum (470 MHz,  $\text{C}_6\text{D}_6$ ) of the doubly hydroboration product **16** of *tert*-butylidiallylphosphine (**15**).

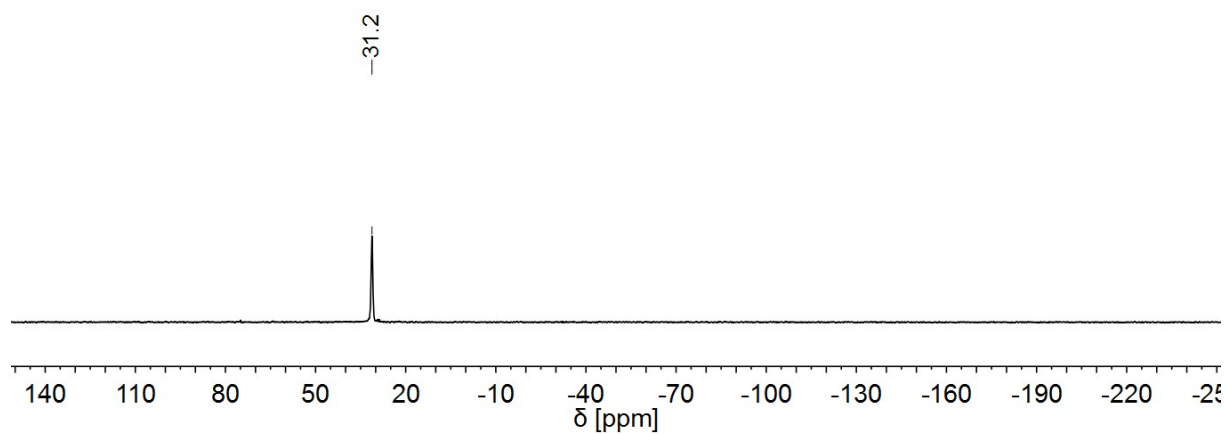

Figure S36.  $^{31}\text{P}$  NMR spectrum (203 MHz,  $\text{C}_6\text{D}_6$ ) of the doubly hydroboration product **16** of *tert*-butylidiallylphosphine (**15**).

## Computational details

**Table S1.** Calculated electronic energies ( $\Delta E$ , PW6B95-D3BJ(abc)/def2-TZVP), solvation free energies ( $\delta_{\text{solvation}}$ , PW6B95-D3BJ(abc)/def2-TZVP/COSMO(CH<sub>2</sub>Cl<sub>2</sub>)) and thermodynamic contributions ( $\delta_{\text{thermo}}$ , PBEh-3c) as well as resulting Gibbs free energies ( $\Delta G$ ) of the compounds depicted in Figures S37–S44. All parameters are given in kJ mol<sup>-1</sup>.

|                                 | $\Delta E$  | $\delta_{\text{thermo}}$ | $\delta_{\text{solvation}}$ | $\Delta G$  |
|---------------------------------|-------------|--------------------------|-----------------------------|-------------|
| <b>closed-13</b>                | -9912966.34 | 971.52                   | -44.71                      | -9912039.53 |
| <b>open-13</b>                  | -9912870.55 | 961.75                   | -34.96                      | -9911943.75 |
| <b>13-H<sub>2</sub></b>         | -9915957.14 | 1012.42                  | -94.40                      | -9915039.12 |
| <b>bridged-13-H<sub>2</sub></b> | -9916003.17 | 1031.99                  | -86.27                      | -9915057.45 |
| <b>closed-16</b>                | -9718838.02 | 1055.64                  | -39.85                      | -9717822.24 |
| <b>open-16</b>                  | -9718750.34 | 1045.24                  | -32.16                      | -9717737.26 |
| <b>16-H<sub>2</sub></b>         | -9721851.47 | 1096.15                  | -95.52                      | -9720850.84 |
| <b>bridged-16-H<sub>2</sub></b> | -9721904.73 | 1114.81                  | -83.37                      | -9720873.29 |
| H <sub>2</sub>                  | -3084.75    | -6.46                    | -0.79                       | -3092.00    |

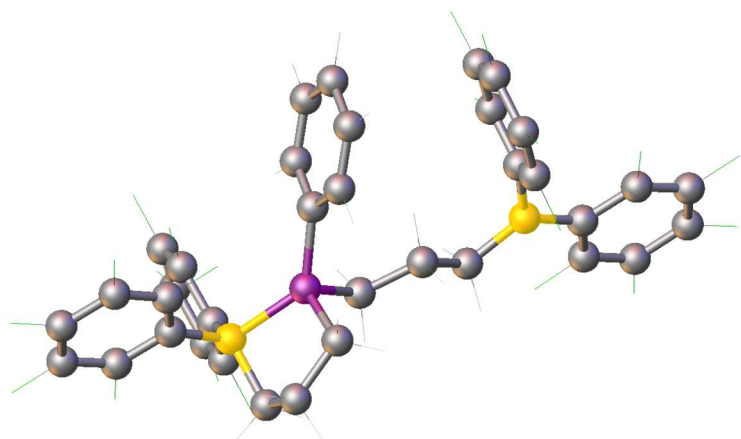

**Figure S37.** Optimized molecular structure of the 5-membered ring conformer of **13** (**closed-13**).

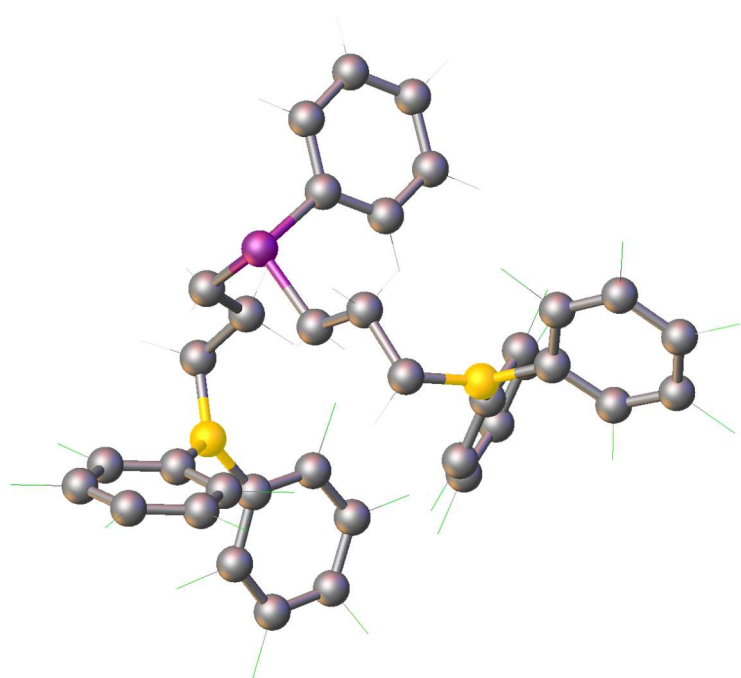

**Figure S38.** Optimized molecular structure of the open conformer of **13** (**open-13**).

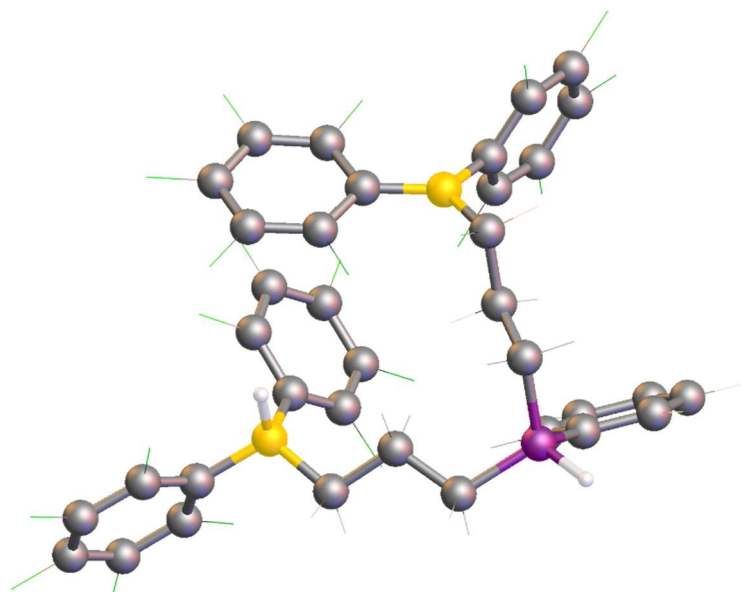

**Figure S39.** Optimized molecular structure of the hydrogen splitting product of **13** (**13-H<sub>2</sub>**).

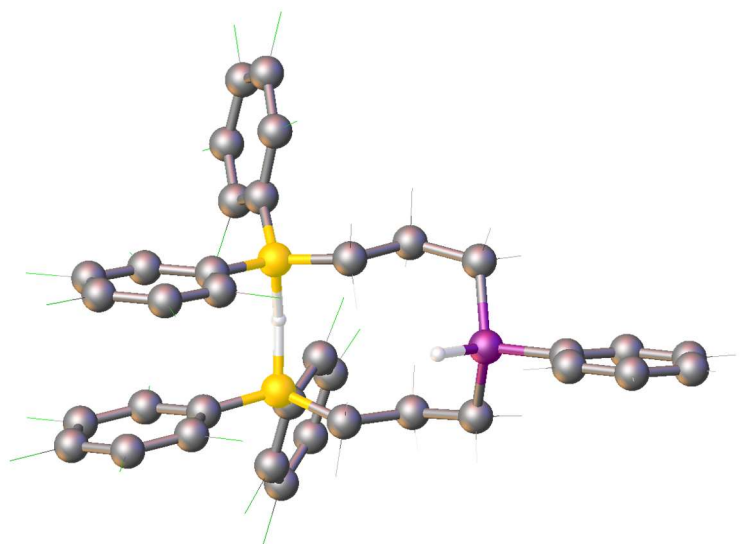

**Figure S40.** Optimized molecular structure of the 10-membered ring conformer of the hydrogen splitting product of **13** (**bridged-5-H<sub>2</sub>**).

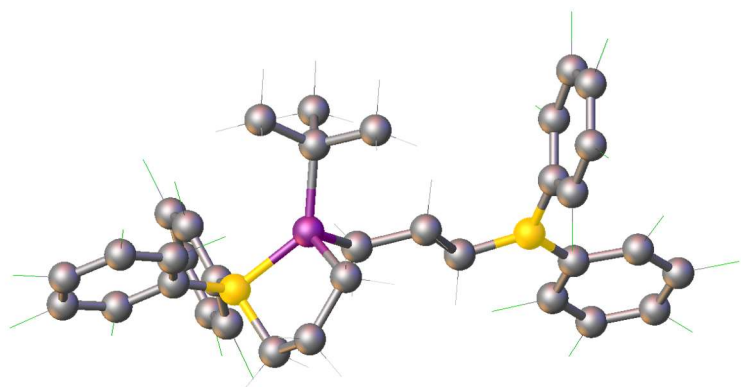

**Figure S41.** Optimized molecular structure of the 5-membered ring conformer of **16** (**closed-16**).



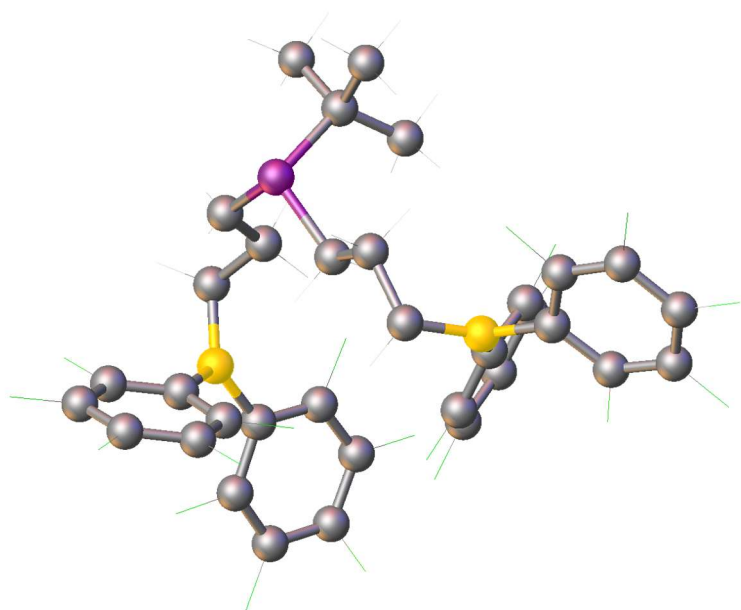

**Figure S42.** Optimized molecular structure of the open conformer of **16** (**open-16**).

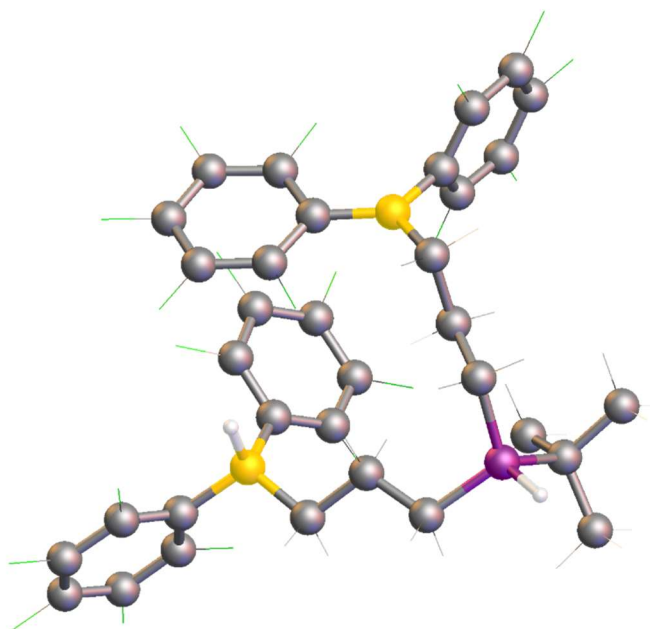

**Figure S43.** Optimized molecular structure of the open chain conformer of the hydrogen splitting product of **16** (**16-H<sub>2</sub>**).

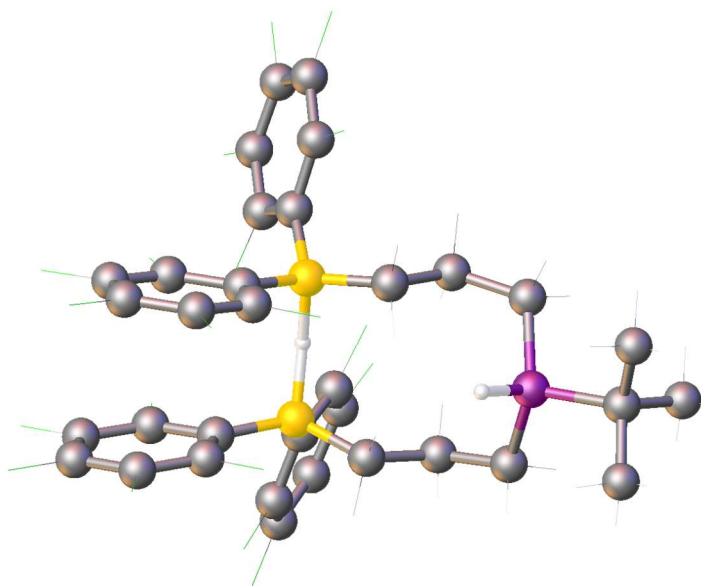

**Figure S44.** Optimized molecular structure of the 10-membered ring conformer of the hydrogen splitting product of **16** (bridged-16-H<sub>2</sub>).

**Table S2.** Cartesian coordinates of the optimized structure of **closed-13**.

|   |            |            |            |
|---|------------|------------|------------|
| C | -0.1894970 | 0.1793937  | 1.1567805  |
| C | -2.3185495 | 1.2717538  | 2.8463079  |
| C | -3.1553394 | 0.1314444  | 3.4595501  |
| C | -2.8353018 | -1.1841391 | 2.7457823  |
| B | -3.0488104 | -0.9591364 | 1.1306519  |
| C | 0.7864966  | 1.3380065  | 1.3106198  |
| C | 2.2516969  | 0.9084569  | 1.2787412  |
| H | -1.3783976 | 1.4175691  | 3.3809010  |
| H | -2.8474083 | 2.2227985  | 2.8640403  |
| H | -0.0031403 | -0.3508180 | 0.2184142  |
| H | -0.0753562 | -0.5609629 | 1.9516032  |
| H | -4.2150694 | 0.3672957  | 3.3477550  |
| H | -2.9671665 | 0.0713475  | 4.5329532  |
| H | -3.4898548 | -1.9811406 | 3.1054194  |
| H | -1.8244628 | -1.4944093 | 3.0202415  |
| H | 0.5851519  | 1.8759989  | 2.2416566  |
| H | 0.5971461  | 2.0506294  | 0.5089568  |
| H | 2.4075849  | 0.2310578  | 0.4240899  |
| H | 2.4938327  | 0.2979561  | 2.1517383  |
| B | 3.2868243  | 2.0718117  | 1.0537085  |
| P | -1.9501224 | 0.7145337  | 1.1354514  |
| C | -1.8907421 | 2.1105010  | -0.0249112 |
| C | -1.4977615 | 1.8651949  | -1.3397747 |
| C | -2.1126088 | 3.4226635  | 0.3803770  |
| C | -1.3257206 | 2.9143217  | -2.2278677 |
| H | -1.3053946 | 0.8564988  | -1.6793428 |
| C | -1.9407148 | 4.4715390  | -0.5108300 |
| H | -2.4086454 | 3.6455707  | 1.3959812  |
| C | -1.5466177 | 4.2206649  | -1.8158780 |
| H | -1.0201938 | 2.7095177  | -3.2450178 |
| H | -2.1158220 | 5.4870676  | -0.1815061 |
| H | -1.4118186 | 5.0392144  | -2.5100816 |
| C | 4.8254134  | 1.9249634  | 1.2619254  |
| C | 5.4495933  | 0.6876006  | 1.4378349  |
| C | 5.6770812  | 3.0336189  | 1.2763356  |
| C | 6.8118351  | 0.5490472  | 1.6166005  |
| C | 7.0422158  | 2.9311083  | 1.4623975  |
| C | 7.6093676  | 1.6803241  | 1.6315668  |
| C | 2.6855646  | 3.4268464  | 0.5089558  |
| C | 2.1272396  | 4.3651822  | 1.3509752  |
| C | 2.5549233  | 3.6353622  | -0.8470979 |
| C | 1.4579444  | 5.4763065  | 0.8770859  |
| C | 1.8868884  | 4.7296255  | -1.3648400 |
| C | 1.3391818  | 5.6520537  | -0.4916094 |
| C | -4.6279863 | -0.7529369 | 0.8304180  |
| C | -5.2892140 | 0.4495341  | 0.6723136  |
| C | -5.4357192 | -1.8791075 | 0.7589345  |
| C | -6.6478226 | 0.5542516  | 0.4324415  |
| C | -6.7975728 | -1.8266199 | 0.5229574  |
| C | -7.4075976 | -0.5968356 | 0.3536518  |
| C | -2.3882054 | -1.9930259 | 0.0719008  |
| C | -1.6329588 | -3.1117097 | 0.3876589  |
| C | -2.6030185 | -1.7974384 | -1.2860529 |
| C | -1.1249748 | -3.9770646 | -0.5685535 |
| C | -2.1160140 | -2.6332162 | -2.2732688 |
| C | -1.3692124 | -3.7379891 | -1.9069194 |
| F | -4.6067797 | 1.6024173  | 0.7587162  |
| F | -7.2236366 | 1.7425955  | 0.2840302  |
| F | -8.7121475 | -0.5229623 | 0.1274770  |
| F | -7.5228588 | -2.9373046 | 0.4641313  |
| F | -3.3084239 | -0.7348921 | -1.6900669 |
| F | -2.3504919 | -2.3850391 | -3.5572008 |
| F | -0.8882429 | -4.5565958 | -2.8319210 |
| F | -0.4063279 | -5.0349731 | -0.2094006 |
| F | -1.3599342 | -3.4179649 | 1.6569007  |
| F | -4.8970719 | -3.0884972 | 0.9320005  |
| F | 5.1948298  | 4.2585069  | 1.1269862  |
| F | 7.8085768  | 4.0106920  | 1.4807488  |
| F | 8.9102179  | 1.5655678  | 1.8065146  |
| F | 7.3597576  | -0.6464591 | 1.7714075  |
| F | 4.7402541  | -0.4325681 | 1.4173644  |

|   |           |           |            |
|---|-----------|-----------|------------|
| F | 3.0595938 | 2.7255245 | -1.6857227 |
| F | 1.7483835 | 4.8920980 | -2.6733176 |
| F | 0.6794127 | 6.6988042 | -0.9664341 |
| F | 0.9169127 | 6.3577034 | 1.7070831  |
| F | 2.2175675 | 4.1733686 | 2.6706086  |

**Table S3.** Cartesian coordinates of the optimized structure of **open-13**.

|   |            |            |            |
|---|------------|------------|------------|
| C | 1.5036979  | 3.2792952  | 1.5622894  |
| C | -0.6784055 | 2.3177276  | -0.0042981 |
| C | -2.1310386 | 2.3653387  | -0.4611490 |
| C | -2.4341676 | 1.3849473  | -1.6293126 |
| C | 1.9072821  | 1.9305684  | 2.1426476  |
| C | 3.4456323  | 1.6895064  | 2.0940918  |
| H | -0.0330605 | 2.5550244  | -0.8556663 |
| H | -0.3995837 | 1.3103246  | 0.3142931  |
| H | 1.8737389  | 4.0777958  | 2.2106682  |
| H | 1.9794025  | 3.4512649  | 0.5922111  |
| H | -2.3626085 | 3.3794609  | -0.7923162 |
| H | -2.7907073 | 2.1895127  | 0.3940574  |
| H | -1.5103837 | 1.2273226  | -2.1936510 |
| H | -3.1365327 | 1.8462395  | -2.3230411 |
| H | 1.3697286  | 1.1231709  | 1.6351852  |
| H | 1.5758535  | 1.8733016  | 3.1800121  |
| H | 3.7698793  | 1.1544319  | 2.9853765  |
| H | 3.9487460  | 2.6596300  | 2.1136225  |
| B | 3.7532176  | 0.9141992  | 0.7726536  |
| P | -0.3058682 | 3.6120235  | 1.2720234  |
| C | -1.0601512 | 2.9292365  | 2.7989935  |
| C | -1.3304219 | 1.5798590  | 3.0144422  |
| C | -1.3777201 | 3.8368675  | 3.8081277  |
| C | -1.8957092 | 1.1455959  | 4.2035248  |
| H | -1.0867676 | 0.8513167  | 2.2525126  |
| C | -1.9276592 | 3.4060865  | 5.0064651  |
| H | -1.1983441 | 4.8939309  | 3.6497837  |
| C | -2.1904552 | 2.0590101  | 5.2050632  |
| H | -2.1014251 | 0.0935096  | 4.3487458  |
| H | -2.1620472 | 4.1248395  | 5.7806787  |
| H | -2.6291676 | 1.7216560  | 6.1348356  |
| C | 3.5854932  | 1.6679575  | -0.6000820 |
| C | 2.6092311  | 1.2594951  | -1.4898902 |
| C | 4.3201535  | 2.7875069  | -0.9484306 |
| C | 2.3370913  | 1.9377314  | -2.6624201 |
| C | 4.1004010  | 3.4772931  | -2.1262460 |
| C | 3.0953412  | 3.0516141  | -2.9802108 |
| C | 4.0932503  | -0.6128182 | 0.7385290  |
| C | 3.5671957  | -1.5233899 | 1.6490801  |
| C | 4.9663025  | -1.1324244 | -0.2124451 |
| C | 3.8825209  | -2.8679320 | 1.6277532  |
| C | 5.3160165  | -2.4682595 | -0.2552755 |
| C | 4.7656448  | -3.3372212 | 0.6705742  |
| F | 5.2897251  | 3.2093053  | -0.1394187 |
| F | 4.8290310  | 4.5373847  | -2.4435855 |
| F | 2.8594718  | 3.7117108  | -4.1012323 |
| F | 1.3620077  | 1.5437517  | -3.4706798 |
| F | 1.8659721  | 0.1935416  | -1.1885013 |
| F | 5.5332803  | -0.3246057 | -1.1028230 |
| F | 6.1692255  | -2.9220463 | -1.1616135 |
| F | 5.0870553  | -4.6172148 | 0.6440114  |
| F | 3.3655646  | -3.7066264 | 2.5122133  |
| F | 2.6952964  | -1.1169621 | 2.5673536  |
| B | -2.9788075 | 0.0285109  | -1.0717093 |
| C | -4.4801256 | -0.3910762 | -1.2275917 |
| C | -5.5229849 | 0.5194295  | -1.1108715 |
| C | -4.8374617 | -1.7060057 | -1.5009945 |
| C | -6.8488828 | 0.1537061  | -1.2423103 |
| C | -6.1506413 | -2.1038911 | -1.6634685 |
| C | -7.1591850 | -1.1654433 | -1.5261257 |
| C | -2.0355623 | -0.9294752 | -0.2528643 |
| C | -0.8575177 | -1.4463248 | -0.7664555 |
| C | -2.3549502 | -1.2736814 | 1.0500063  |
| C | -0.0168532 | -2.2508678 | -0.0197607 |
| C | -1.5344723 | -2.0656359 | 1.8308118  |
| C | -0.3582033 | -2.5526871 | 1.2881182  |
| F | -1.8554555 | -2.3546922 | 3.0857070  |
| F | 0.4336474  | -3.3215453 | 2.0147680  |
| F | 1.1024054  | -2.7428654 | -0.5347335 |
| F | -0.5385806 | -1.2033054 | -2.0339948 |
| F | -3.4739342 | -0.7989206 | 1.5954006  |

|   |            |            |            |
|---|------------|------------|------------|
| F | -3.8916261 | -2.6284061 | -1.6542910 |
| F | -8.4209297 | -1.5292503 | -1.6670349 |
| F | -7.8194261 | 1.0444966  | -1.0997793 |
| F | -5.2638101 | 1.7900210  | -0.8196950 |
| F | -6.4530266 | -3.3625912 | -1.9467745 |

**Table S4.** Cartesian coordinates of the optimized structure of **13-H<sub>2</sub>**.

|   |            |            |            |
|---|------------|------------|------------|
| C | 1.6302930  | -2.2812094 | 3.3554074  |
| C | -1.0005130 | -3.4521776 | 2.4267831  |
| C | -1.2863634 | -2.0672834 | 1.8282094  |
| C | -2.7184672 | -1.8862679 | 1.3512124  |
| C | 2.0242276  | -1.3186175 | 2.2342959  |
| C | 2.7669960  | -0.0713400 | 2.7487669  |
| H | -1.3566152 | -4.2499318 | 1.7694939  |
| H | -1.5125239 | -3.5759080 | 3.3843755  |
| H | 2.5126715  | -2.6303341 | 3.8973435  |
| H | 0.9713100  | -1.7970876 | 4.0801906  |
| H | -0.6050287 | -1.8827263 | 0.9959478  |
| H | -1.0626266 | -1.2968739 | 2.5697778  |
| H | -3.3819098 | -1.8949809 | 2.2224997  |
| H | -3.0225162 | -2.7344276 | 0.7313052  |
| H | 1.1262143  | -1.0289540 | 1.6889766  |
| H | 2.6591333  | -1.8413261 | 1.5170925  |
| H | 3.7881692  | -0.3540990 | 3.0147329  |
| H | 2.2933458  | 0.3174785  | 3.6480796  |
| B | 2.7487549  | 0.9279020  | 1.5266492  |
| P | 0.7644003  | -3.7524842 | 2.7077097  |
| C | 1.6202827  | -4.3298024 | 1.2464061  |
| C | 2.8436711  | -4.9829931 | 1.3972706  |
| C | 1.1303703  | -4.0323505 | -0.0220476 |
| C | 3.5729408  | -5.3333084 | 0.2748083  |
| H | 3.2291172  | -5.2238922 | 2.3812270  |
| C | 1.8749516  | -4.3757978 | -1.1399371 |
| H | 0.1804133  | -3.5368971 | -0.1595368 |
| C | 3.0918707  | -5.0224514 | -0.9912356 |
| H | 4.5178682  | -5.8470145 | 0.3867386  |
| H | 1.4984533  | -4.1242413 | -2.1214376 |
| H | 3.6705123  | -5.2876913 | -1.8658139 |
| C | 1.6398340  | 1.9824618  | 1.2857581  |
| C | 0.4612883  | 2.0420617  | 2.0393115  |
| C | 1.7641580  | 2.9628946  | 0.2946648  |
| C | -0.5136285 | 2.9959906  | 1.8456873  |
| C | 0.8098167  | 3.9350755  | 0.0756972  |
| C | -0.3333256 | 3.9478631  | 0.8556984  |
| C | 3.8730691  | 0.6741702  | 0.4494639  |
| C | 3.6016117  | 0.0224390  | -0.7374366 |
| C | 5.1845431  | 1.0341403  | 0.6861838  |
| C | 4.5864433  | -0.2703473 | -1.6621212 |
| C | 6.1968918  | 0.7778663  | -0.2191750 |
| C | 5.8894016  | 0.1186710  | -1.3982927 |
| F | 2.8510896  | 3.0161006  | -0.4642036 |
| F | 0.9845090  | 4.8599247  | -0.8536048 |
| F | -1.2440319 | 4.8758325  | 0.6656075  |
| F | -1.6015175 | 3.0179224  | 2.5918814  |
| F | 0.2270347  | 1.1451785  | 2.9941378  |
| F | 5.4791229  | 1.6697538  | 1.8227199  |
| F | 7.4463138  | 1.1453211  | 0.0281777  |
| F | 6.8466317  | -0.1469192 | -2.2730867 |
| F | 4.3024506  | -0.9175048 | -2.7829267 |
| F | 2.3480735  | -0.3605139 | -0.9902885 |
| B | -2.8703925 | -0.4302410 | 0.6135443  |
| C | -1.9247147 | -0.2222163 | -0.7187800 |
| C | -1.3253753 | -1.2009120 | -1.4928693 |
| C | -1.6360088 | 1.0713353  | -1.1343174 |
| C | -0.4544985 | -0.9451560 | -2.5385546 |
| C | -0.7803442 | 1.3813867  | -2.1767813 |
| C | -0.1736924 | 0.3604460  | -2.8846183 |
| C | -4.4267969 | -0.1237643 | 0.2520028  |
| C | -5.2398123 | 0.6570652  | 1.0587860  |
| C | -5.0444624 | -0.6429461 | -0.8741173 |
| C | -6.5660301 | 0.9289860  | 0.7647263  |
| C | -6.3642044 | -0.3962853 | -1.2095014 |
| C | -7.1303411 | 0.4013001  | -0.3811001 |
| F | -6.9038093 | -0.9192316 | -2.3101767 |
| F | -8.4026099 | 0.6517775  | -0.6795442 |
| F | -7.3051153 | 1.6901946  | 1.5713036  |
| F | -4.7634851 | 1.1862942  | 2.1887671  |
| F | -4.3581028 | -1.4415844 | -1.7014920 |

|   |            |            |            |
|---|------------|------------|------------|
| F | -2.2047736 | 2.1099053  | -0.5121286 |
| F | 0.6593841  | 0.6320780  | -3.8841624 |
| F | 0.1129214  | -1.9500387 | -3.2135352 |
| F | -1.5537503 | -2.5074667 | -1.2503823 |
| F | -0.5298339 | 2.6495336  | -2.5031476 |
| H | -2.4700644 | 0.3950287  | 1.4149003  |
| H | 0.9149646  | -4.7588868 | 3.6730151  |



**Table S5.** Cartesian coordinates of the optimized structure of **bridged-13-H<sub>2</sub>**.

|   |            |            |            |
|---|------------|------------|------------|
| C | 1.0268798  | -1.8441787 | 1.0841743  |
| H | 1.9038089  | -1.2052787 | 0.9728576  |
| H | 1.0859792  | -2.2059813 | 2.1155031  |
| C | 1.1221056  | -3.0581689 | 0.1557361  |
| H | 0.6412096  | -2.8811485 | -0.8029950 |
| H | 0.5751719  | -3.8962811 | 0.5920768  |
| C | 2.5423328  | -3.5632078 | -0.1086674 |
| H | 2.5258766  | -4.5053268 | -0.6655329 |
| H | 3.0839757  | -3.7589391 | 0.8211583  |
| C | 2.8886278  | -1.8453510 | -2.6339307 |
| H | 3.6997782  | -1.2728324 | -3.0937931 |
| H | 2.7290063  | -2.7238601 | -3.2663627 |
| C | 1.6206432  | -0.9887602 | -2.5046391 |
| H | 0.7693633  | -1.6255898 | -2.2857287 |
| H | 1.4264622  | -0.5787638 | -3.4978255 |
| C | 1.7652634  | 0.1314829  | -1.4853601 |
| C | 5.1525358  | -3.2829148 | -1.4231865 |
| C | 5.1584851  | -4.4415569 | -2.1985469 |
| C | 6.3463597  | -2.7707592 | -0.9225920 |
| C | 6.3553525  | -5.0818298 | -2.4680018 |
| H | 4.2369178  | -4.8505983 | -2.5958751 |
| C | 7.5412433  | -3.4175826 | -1.1964696 |
| H | 6.3518816  | -1.8707415 | -0.3202635 |
| C | 7.5449693  | -4.5699920 | -1.9669464 |
| H | 6.3607748  | -5.9805258 | -3.0691534 |
| H | 8.4679185  | -3.0193957 | -0.8069328 |
| H | 8.4786214  | -5.0729521 | -2.1791842 |
| C | -1.5705406 | -2.0138518 | 0.6430951  |
| C | -2.0315023 | -2.4408408 | -0.5895985 |
| C | -2.1565765 | -2.6488988 | 1.7303683  |
| C | -3.0372589 | -3.3793749 | -0.7484610 |
| C | -3.1615170 | -3.5917227 | 1.6214708  |
| C | -3.6135211 | -3.9541564 | 0.3664550  |
| C | -0.6598839 | 0.1162044  | 2.0759291  |
| C | -1.9414559 | 0.6070522  | 2.3045428  |
| C | 0.3195751  | 0.6787921  | 2.8836988  |
| C | -2.2361871 | 1.5740183  | 3.2500939  |
| C | 0.0699155  | 1.6501418  | 3.8361705  |
| C | -1.2211243 | 2.1020817  | 4.0233286  |
| F | -1.7351256 | -2.3661048 | 2.9672936  |
| F | -3.6879178 | -4.1554766 | 2.7032661  |
| F | -4.5741506 | -4.8597453 | 0.2348487  |
| F | -3.4370538 | -3.7442495 | -1.9629459 |
| F | -1.4828572 | -1.9852594 | -1.7245373 |
| F | -1.4805565 | 3.0322049  | 4.9301825  |
| F | 1.0628166  | 2.1584735  | 4.5609684  |
| F | 1.6022397  | 0.3137704  | 2.7632749  |
| F | -2.9768879 | 0.1539623  | 1.6026166  |
| F | -3.4830382 | 1.9953985  | 3.4219342  |
| B | -0.3477550 | -0.9844596 | 0.9330288  |
| C | 0.6240267  | 2.0948822  | 0.0391536  |
| C | -0.4446081 | 2.8998356  | 0.4262756  |
| C | 1.8421883  | 2.4697941  | 0.5962774  |
| C | -0.3331864 | 3.9742548  | 1.2896052  |
| F | -1.6737780 | 2.6428027  | -0.0134657 |
| C | 1.9998400  | 3.5430266  | 1.4568509  |
| F | 2.9704452  | 1.7979411  | 0.3344123  |
| C | 0.9038011  | 4.3027557  | 1.8092411  |
| F | -1.4025181 | 4.6829740  | 1.6311846  |
| F | 3.1989835  | 3.8437418  | 1.9453152  |
| F | 1.0347235  | 5.3283487  | 2.6358357  |
| C | -0.6409748 | 1.1798348  | -2.1778142 |
| C | -0.1665204 | 1.8505184  | -3.2966277 |
| C | -1.9966302 | 0.8889181  | -2.2102135 |
| C | -0.9457327 | 2.1730766  | -4.3930378 |
| F | 1.1147836  | 2.2394324  | -3.3484048 |
| C | -2.8121608 | 1.1852017  | -3.2892338 |
| F | -2.5963790 | 0.3251378  | -1.1675199 |
| C | -2.2824659 | 1.8268262  | -4.3918573 |
| F | -0.4222285 | 2.8082980  | -5.4380496 |
| F | -4.1022169 | 0.8701507  | -3.2687436 |

|   |            |            |            |
|---|------------|------------|------------|
| F | -3.0510424 | 2.1183656  | -5.4328521 |
| H | 2.4737266  | 0.8647383  | -1.8740161 |
| H | 2.2362522  | -0.2583403 | -0.5855452 |
| B | 0.4087927  | 0.8548709  | -0.9840932 |
| P | 3.6046065  | -2.4492360 | -1.0729190 |
| H | -0.1904536 | -0.1745609 | -0.2053646 |
| H | 3.9720193  | -1.3591418 | -0.2820130 |

**Table S6.** Cartesian coordinates of the optimized structure of **closed-16**.

|   |            |            |            |
|---|------------|------------|------------|
| C | -0.3663461 | 0.5147181  | 0.7215041  |
| C | -2.3832435 | 1.6730322  | 2.4734749  |
| C | -2.9045545 | 0.5245813  | 3.3628490  |
| C | -2.5645677 | -0.8360984 | 2.7439043  |
| B | -2.9952359 | -0.8708588 | 1.1569636  |
| C | 0.6749069  | 1.6097801  | 0.9197115  |
| C | 2.0824855  | 1.0251156  | 1.0281446  |
| H | -1.4246686 | 2.0540745  | 2.8279120  |
| H | -3.0649181 | 2.5216743  | 2.4523585  |
| H | -0.1971608 | 0.0023377  | -0.2285571 |
| H | -0.2322190 | -0.2500687 | 1.4887066  |
| H | -3.9817309 | 0.6252467  | 3.4862850  |
| H | -2.4809530 | 0.6162707  | 4.3646910  |
| H | -3.0882427 | -1.6302515 | 3.2819258  |
| H | -1.5044978 | -1.0324746 | 2.9111154  |
| H | 0.4488262  | 2.1878260  | 1.8186672  |
| H | 0.6423449  | 2.3148660  | 0.0888429  |
| H | 2.2687075  | 0.3821599  | 0.1553740  |
| H | 2.1380000  | 0.3365601  | 1.8770313  |
| B | 3.2667182  | 2.0571867  | 1.0642623  |
| P | -2.1591979 | 0.9535724  | 0.7935223  |
| C | 4.7470517  | 1.6580155  | 1.3614547  |
| C | 5.1828734  | 0.3302414  | 1.3898593  |
| C | 5.7353509  | 2.6153143  | 1.6125289  |
| C | 6.4923825  | -0.0298092 | 1.6400663  |
| C | 7.0517284  | 2.2891366  | 1.8754836  |
| C | 7.4296679  | 0.9580837  | 1.8863265  |
| C | 2.9200681  | 3.5587603  | 0.7212336  |
| C | 2.3626297  | 4.4103926  | 1.6518693  |
| C | 3.0989458  | 4.0474428  | -0.5553720 |
| C | 1.9963951  | 5.7062823  | 1.3419038  |
| C | 2.7427195  | 5.3355739  | -0.9112917 |
| C | 2.1900032  | 6.1662240  | 0.0490472  |
| C | -4.6116432 | -1.0111954 | 1.0371500  |
| C | -5.5252979 | 0.0171138  | 1.1820573  |
| C | -5.1905091 | -2.2659503 | 0.8796173  |
| C | -6.8979230 | -0.1413120 | 1.1170151  |
| C | -6.5566519 | -2.4773023 | 0.8097627  |
| C | -7.4200136 | -1.4041296 | 0.9208727  |
| C | -2.2386508 | -1.9104070 | 0.1600967  |
| C | -1.3234019 | -2.8835583 | 0.5320300  |
| C | -2.5200455 | -1.8740713 | -1.1978238 |
| C | -0.7144261 | -3.7394405 | -0.3721916 |
| C | -1.9372986 | -2.7033141 | -2.1366105 |
| C | -1.0203972 | -3.6485838 | -1.7159351 |
| F | -5.0930349 | 1.2660245  | 1.4161610  |
| F | -7.7091324 | 0.9028555  | 1.2507194  |
| F | -8.7313422 | -1.5867772 | 0.8564094  |
| F | -7.0444924 | -3.7012660 | 0.6475589  |
| F | -3.4089636 | -0.9824039 | -1.6573578 |
| F | -2.2444596 | -2.6005162 | -3.4250756 |
| F | -0.4429750 | -4.4584807 | -2.5922009 |
| F | 0.1606238  | -4.6487379 | 0.0430252  |
| F | -0.9847691 | -3.0570184 | 1.8112906  |
| F | -4.4265199 | -3.3578942 | 0.8124429  |
| F | 5.4380183  | 3.9067783  | 1.6274226  |
| F | 7.9501900  | 3.2311724  | 2.1169332  |
| F | 8.6817051  | 0.6309756  | 2.1322484  |
| F | 6.8579967  | -1.3022062 | 1.6469670  |
| F | 4.3366865  | -0.6623369 | 1.1527900  |
| F | 3.6233485  | 3.2399268  | -1.4811544 |
| F | 2.9199969  | 5.7776392  | -2.1474988 |
| F | 1.8425708  | 7.4028763  | -0.2691254 |
| F | 1.4666017  | 6.5055876  | 2.2565149  |
| F | 2.1780865  | 3.9648315  | 2.8980815  |
| C | -2.4196310 | 2.2414356  | -0.5603792 |
| C | -1.5883386 | 1.8455119  | -1.7862366 |
| H | -1.7636699 | 2.5778834  | -2.5769364 |
| H | -0.5162573 | 1.8379131  | -1.5969759 |
| H | -1.8733659 | 0.8738601  | -2.1850579 |
| C | -1.9733719 | 3.6186926  | -0.0567198 |

|   |            |           |            |
|---|------------|-----------|------------|
| H | -0.9341922 | 3.6493085 | 0.2663220  |
| H | -2.0804232 | 4.3431648 | -0.8677311 |
| H | -2.5905418 | 3.9713416 | 0.7692385  |
| C | -3.8836237 | 2.3417243 | -0.9935102 |
| H | -4.3004738 | 1.3808631 | -1.2873908 |
| H | -4.5177090 | 2.7772242 | -0.2271968 |
| H | -3.9385425 | 2.9999873 | -1.8633963 |

**Table S7.** Cartesian coordinates of the optimized structure of **open-16**.

|   |            |            |            |
|---|------------|------------|------------|
| C | 1.4843986  | 3.1607227  | 1.6388795  |
| C | -0.7456651 | 2.1431865  | 0.2076127  |
| C | -2.0991833 | 2.3211379  | -0.4714716 |
| C | -2.3534714 | 1.3324759  | -1.6416251 |
| C | 1.9345302  | 1.7988309  | 2.1554875  |
| C | 3.4771614  | 1.6025791  | 2.0457593  |
| H | 0.0317976  | 2.1649107  | -0.5622273 |
| H | -0.6664981 | 1.1681100  | 0.6921646  |
| H | 1.8811904  | 3.9443802  | 2.2899306  |
| H | 1.9384447  | 3.3578303  | 0.6625212  |
| H | -2.1582608 | 3.3365473  | -0.8690983 |
| H | -2.9003086 | 2.2582037  | 0.2691419  |
| H | -1.4080019 | 1.1915305  | -2.1747268 |
| H | -3.0382202 | 1.7924080  | -2.3545319 |
| H | 1.3952191  | 1.0008088  | 1.6360904  |
| H | 1.6544730  | 1.6904234  | 3.2038420  |
| H | 3.8509042  | 1.0645288  | 2.9156315  |
| H | 3.9504108  | 2.5872823  | 2.0625811  |
| B | 3.7598007  | 0.8553561  | 0.7027933  |
| P | -0.3150247 | 3.5423122  | 1.3574262  |
| C | 3.5618425  | 1.6331328  | -0.6521247 |
| C | 2.5922100  | 1.2187601  | -1.5470753 |
| C | 4.2720712  | 2.7732031  | -0.9855737 |
| C | 2.3044384  | 1.9075179  | -2.7094337 |
| C | 4.0371272  | 3.4743572  | -2.1539544 |
| C | 3.0399309  | 3.0406424  | -3.0128020 |
| C | 4.1108218  | -0.6683671 | 0.6381766  |
| C | 3.6299077  | -1.5936023 | 1.5595533  |
| C | 4.9531005  | -1.1707724 | -0.3495531 |
| C | 3.9560996  | -2.9348237 | 1.5125185  |
| C | 5.3139016  | -2.5025416 | -0.4185535 |
| C | 4.8065095  | -3.3862212 | 0.5179215  |
| F | 5.2368040  | 3.2028156  | -0.1748199 |
| F | 4.7455869  | 4.5518667  | -2.4580720 |
| F | 2.7904451  | 3.7103538  | -4.1249688 |
| F | 1.3378057  | 1.5036526  | -3.5228214 |
| F | 1.8718011  | 0.1334179  | -1.2611035 |
| F | 5.4803958  | -0.3498983 | -1.2522815 |
| F | 6.1377395  | -2.9385155 | -1.3601161 |
| F | 5.1388228  | -4.6626026 | 0.4664571  |
| F | 3.4814343  | -3.7868333 | 2.4077993  |
| F | 2.7931180  | -1.2056018 | 2.5178041  |
| B | -2.8968111 | -0.0431355 | -1.1282132 |
| C | -4.3912502 | -0.4768236 | -1.3111653 |
| C | -5.4480692 | 0.4207607  | -1.2134554 |
| C | -4.7310828 | -1.7979638 | -1.5820829 |
| C | -6.7678576 | 0.0382969  | -1.3576994 |
| C | -6.0376019 | -2.2125796 | -1.7567306 |
| C | -7.0592065 | -1.2861026 | -1.6363994 |
| C | -1.9482131 | -1.0074960 | -0.3244493 |
| C | -0.7751813 | -1.5224772 | -0.8481519 |
| C | -2.2453455 | -1.3303141 | 0.9876779  |
| C | 0.0819820  | -2.3072088 | -0.0997460 |
| C | -1.4047384 | -2.0931162 | 1.7753244  |
| C | -0.2359882 | -2.5845903 | 1.2195508  |
| F | -1.7023702 | -2.3578734 | 3.0391746  |
| F | 0.5732284  | -3.3363118 | 1.9467381  |
| F | 1.1964507  | -2.8026714 | -0.6227279 |
| F | -0.4784144 | -1.2935779 | -2.1243425 |
| F | -3.3664839 | -0.8554110 | 1.5346397  |
| F | -3.7752753 | -2.7112630 | -1.7201899 |
| F | -8.3146005 | -1.6660846 | -1.7886601 |
| F | -7.7503818 | 0.9185484  | -1.2315285 |
| F | -5.2122543 | 1.6974912  | -0.9280386 |
| F | -6.3214876 | -3.4764939 | -2.0351778 |
| C | -1.1875636 | 3.1394150  | 2.9820280  |
| C | -2.5612848 | 3.8164296  | 2.9121129  |
| H | -3.1818988 | 3.4099728  | 2.1120747  |
| H | -3.1043907 | 3.6661635  | 3.8490825  |
| H | -2.4722545 | 4.8899950  | 2.7434711  |
| C | -1.3848476 | 1.6552385  | 3.2746559  |

|   |            |           |           |
|---|------------|-----------|-----------|
| H | -1.8549232 | 1.5249988 | 4.2533772 |
| H | -2.0455008 | 1.1847600 | 2.5467325 |
| H | -0.4501518 | 1.0957965 | 3.2890983 |
| C | -0.3888829 | 3.7968436 | 4.1093265 |
| H | -0.1889856 | 4.8509526 | 3.9046205 |
| H | -0.9533776 | 3.7490553 | 5.0439373 |
| H | 0.5675358  | 3.3033614 | 4.2858603 |

**Table S8.** Cartesian coordinates of the optimized structure of **16-H<sub>2</sub>**.

|   |            |            |            |
|---|------------|------------|------------|
| C | 1.6944143  | -2.2866594 | 3.2117019  |
| C | -0.9853177 | -3.4318598 | 2.4119457  |
| C | -1.2467667 | -2.0706473 | 1.7555125  |
| C | -2.6844469 | -1.8699307 | 1.3062245  |
| C | 2.0365291  | -1.2708706 | 2.1215630  |
| C | 2.7536263  | -0.0306522 | 2.6855724  |
| H | -1.3869276 | -4.2414632 | 1.7968290  |
| H | -1.4781768 | -3.5006424 | 3.3846979  |
| H | 2.6007572  | -2.6387864 | 3.7103933  |
| H | 1.0711432  | -1.8221644 | 3.9810357  |
| H | -0.5815974 | -1.9531513 | 0.8987451  |
| H | -0.9852999 | -1.2741314 | 2.4561064  |
| H | -3.3320282 | -1.8795524 | 2.1898181  |
| H | -3.0063593 | -2.7109446 | 0.6851251  |
| H | 1.1249667  | -0.9822763 | 1.6003622  |
| H | 2.6820015  | -1.7363630 | 1.3758070  |
| H | 3.7765873  | -0.3060859 | 2.9533310  |
| H | 2.2636852  | 0.3124013  | 3.5948716  |
| B | 2.7393411  | 1.0246919  | 1.5105446  |
| P | 0.7818191  | -3.7660600 | 2.6570460  |
| C | 1.6192674  | 2.0709122  | 1.2940215  |
| C | 0.4394975  | 2.0998477  | 2.0486025  |
| C | 1.7325147  | 3.0776292  | 0.3271305  |
| C | -0.5441153 | 3.0493033  | 1.8799244  |
| C | 0.7668964  | 4.0429705  | 0.1304282  |
| C | -0.3752884 | 4.0253207  | 0.9115258  |
| C | 3.8982652  | 0.8533935  | 0.4537988  |
| C | 3.6830334  | 0.2546266  | -0.7715010 |
| C | 5.1859265  | 1.2591364  | 0.7404638  |
| C | 4.6974057  | 0.0654271  | -1.6911411 |
| C | 6.2275364  | 1.1016652  | -0.1543487 |
| C | 5.9749909  | 0.4994099  | -1.3761295 |
| F | 2.8177384  | 3.1634865  | -0.4307362 |
| F | 0.9299710  | 4.9896871  | -0.7785556 |
| F | -1.2963842 | 4.9468216  | 0.7427126  |
| F | -1.6305004 | 3.0442334  | 2.6283062  |
| F | 0.2153937  | 1.1783199  | 2.9817236  |
| F | 5.4255049  | 1.8448423  | 1.9162752  |
| F | 7.4525379  | 1.5114730  | 0.1421867  |
| F | 6.9601829  | 0.3308561  | -2.2432656 |
| F | 4.4666356  | -0.5244818 | -2.8539548 |
| F | 2.4536321  | -0.1752868 | -1.0701043 |
| B | -2.8412680 | -0.4052815 | 0.5870101  |
| C | -1.8996984 | -0.1793279 | -0.7436544 |
| C | -1.2988122 | -1.1503773 | -1.5272036 |
| C | -1.6049442 | 1.1193036  | -1.1375969 |
| C | -0.4146134 | -0.8810923 | -2.5591948 |
| C | -0.7395109 | 1.4422823  | -2.1676173 |
| C | -0.1285882 | 0.4294770  | -2.8832219 |
| C | -4.4017931 | -0.0992365 | 0.2429559  |
| C | -5.2088656 | 0.6749422  | 1.0619344  |
| C | -5.0312146 | -0.6199908 | -0.8759072 |
| C | -6.5411120 | 0.9377098  | 0.7871903  |
| C | -6.3579562 | -0.3841484 | -1.1909759 |
| C | -7.1181965 | 0.4064844  | -0.3504540 |
| F | -6.9102730 | -0.9111426 | -2.2835376 |
| F | -8.3968924 | 0.6469854  | -0.6296144 |
| F | -7.2740838 | 1.6927959  | 1.6053202  |
| F | -4.7213232 | 1.2057689  | 2.1865137  |
| F | -4.3500839 | -1.4105760 | -1.7148313 |
| F | -2.1759631 | 2.1503842  | -0.5036188 |
| F | 0.7153389  | 0.7140613  | -3.8704400 |
| F | 0.1613827  | -1.8754556 | -3.2380709 |
| F | -1.5397236 | -2.4566239 | -1.3088713 |
| F | -0.4821318 | 2.7148998  | -2.4733238 |
| H | -2.4379301 | 0.4087373  | 1.3989946  |
| H | 0.9138982  | -4.6701351 | 3.7231440  |
| C | 1.5607543  | -4.6474701 | 1.2380274  |
| C | 1.2816823  | -3.9310093 | -0.0848354 |
| H | 0.2196182  | -3.8636828 | -0.3111667 |
| H | 1.6959620  | -2.9254533 | -0.1313545 |

|   |            |            |            |
|---|------------|------------|------------|
| H | 1.7439197  | -4.5030798 | -0.8911146 |
| C | 3.0630856  | -4.7489142 | 1.5111244  |
| H | 3.2843685  | -5.2469831 | 2.4572570  |
| H | 3.5274464  | -5.3401618 | 0.7205271  |
| H | 3.5552745  | -3.7764256 | 1.5121818  |
| C | 0.9421509  | -6.0501462 | 1.2033689  |
| H | 1.3888542  | -6.6095067 | 0.3801327  |
| H | 1.1285395  | -6.6141653 | 2.1186902  |
| H | -0.1330904 | -6.0297365 | 1.0235481  |



**Table S9.** Cartesian coordinates of the optimized structure of **bridged-16-H<sub>2</sub>**.

|   |            |            |            |
|---|------------|------------|------------|
| C | 1.0149703  | -1.8491813 | 1.0774096  |
| H | 1.8936790  | -1.2140148 | 0.9625524  |
| H | 1.0750839  | -2.2093669 | 2.1094003  |
| C | 1.1061404  | -3.0669182 | 0.1531561  |
| H | 0.6253471  | -2.8955868 | -0.8061533 |
| H | 0.5580206  | -3.9017820 | 0.5943934  |
| C | 2.5276740  | -3.5788598 | -0.1047767 |
| H | 2.5014451  | -4.5336240 | -0.6382881 |
| H | 3.0522412  | -3.7523156 | 0.8383005  |
| C | 2.8372892  | -1.8836055 | -2.6370432 |
| H | 3.6287852  | -1.3159459 | -3.1337824 |
| H | 2.6386678  | -2.7628025 | -3.2563944 |
| C | 1.5836512  | -1.0063203 | -2.4876736 |
| H | 0.7290330  | -1.6300747 | -2.2485924 |
| H | 1.3759030  | -0.6043329 | -3.4815557 |
| C | 1.7538362  | 0.1224660  | -1.4832995 |
| C | -1.5850501 | -2.0084153 | 0.6466675  |
| C | -2.0473402 | -2.4397184 | -0.5841347 |
| C | -2.1696070 | -2.6407618 | 1.7366023  |
| C | -3.0484474 | -3.3838464 | -0.7390846 |
| C | -3.1711971 | -3.5878752 | 1.6314216  |
| C | -3.6213586 | -3.9578809 | 0.3778839  |
| C | -0.6586701 | 0.1180141  | 2.0762310  |
| C | -1.9356023 | 0.6212662  | 2.3036505  |
| C | 0.3256723  | 0.6709244  | 2.8846537  |
| C | -2.2218382 | 1.5915264  | 3.2485767  |
| C | 0.0843640  | 1.6438619  | 3.8377435  |
| C | -1.2022890 | 2.1086984  | 4.0235934  |
| F | -1.7480112 | -2.3532923 | 2.9724847  |
| F | -3.6949128 | -4.1496016 | 2.7156389  |
| F | -4.5765089 | -4.8698050 | 0.2493444  |
| F | -3.4460145 | -3.7554381 | -1.9522703 |
| F | -1.5032032 | -1.9853327 | -1.7216095 |
| F | -1.4526983 | 3.0417813  | 4.9300248  |
| F | 1.0814959  | 2.1423588  | 4.5635680  |
| F | 1.6053209  | 0.2952106  | 2.7641090  |
| F | -2.9735830 | 0.1785887  | 1.5986872  |
| F | -3.4642210 | 2.0270937  | 3.4175797  |
| B | -0.3570062 | -0.9833509 | 0.9309490  |
| C | 0.6192678  | 2.0947283  | 0.0389730  |
| C | -0.4493829 | 2.8984434  | 0.4283685  |
| C | 1.8386179  | 2.4693444  | 0.5932084  |
| C | -0.3371081 | 3.9711731  | 1.2935064  |
| F | -1.6788287 | 2.6413130  | -0.0109413 |
| C | 1.9969207  | 3.5405261  | 1.4563289  |
| F | 2.9665501  | 1.8001629  | 0.3243061  |
| C | 0.9004082  | 4.2976588  | 1.8135490  |
| F | -1.4061729 | 4.6790799  | 1.6377060  |
| F | 3.1967848  | 3.8413774  | 1.9430733  |
| F | 1.0312101  | 5.3195566  | 2.6447997  |
| C | -0.6420676 | 1.1863411  | -2.1795111 |
| C | -0.1592684 | 1.8620428  | -3.2918740 |
| C | -1.9978856 | 0.8974794  | -2.2217374 |
| C | -0.9305240 | 2.1906724  | -4.3919694 |
| F | 1.1228508  | 2.2501597  | -3.3334001 |
| C | -2.8057972 | 1.2005789  | -3.3048891 |
| F | -2.6052594 | 0.3299408  | -1.1853732 |
| C | -2.2680843 | 1.8473623  | -4.4007505 |
| F | -0.3983395 | 2.8288639  | -5.4309748 |
| F | -4.0964223 | 0.8871079  | -3.2944841 |
| F | -3.0296912 | 2.1468247  | -5.4447725 |
| H | 2.4625429  | 0.8470945  | -1.8876364 |
| H | 2.2312885  | -0.2614603 | -0.5852424 |
| B | 0.4026618  | 0.8552244  | -0.9829029 |
| P | 3.5913386  | -2.4830944 | -1.0916452 |
| H | -0.2025725 | -0.1726736 | -0.2060037 |
| H | 3.9416626  | -1.3811229 | -0.3060421 |
| C | 5.2028853  | -3.3073163 | -1.4466896 |
| C | 4.9836528  | -4.5118444 | -2.3627848 |
| H | 5.9429601  | -4.9951289 | -2.5541739 |
| H | 4.3314920  | -5.2643548 | -1.9180026 |

|   |           |            |            |
|---|-----------|------------|------------|
| H | 4.5692815 | -4.2293233 | -3.3310389 |
| C | 5.8090210 | -3.7503677 | -0.1119932 |
| H | 5.2165795 | -4.5204462 | 0.3818097  |
| H | 6.7981443 | -4.1740564 | -0.2925459 |
| H | 5.9370608 | -2.9185507 | 0.5829792  |
| C | 6.1244049 | -2.2853535 | -2.1190495 |
| H | 5.7643236 | -1.9753961 | -3.0998709 |
| H | 6.2691452 | -1.3913011 | -1.5104899 |
| H | 7.1065671 | -2.7362781 | -2.2689495 |
